# Supplementary material
Source: PubMed Central journal article supplement (PMC7733808)
Supplement: pnas.2019743117.sapp.pdf [file pnas.2019743117.sapp.pdf]

# PNAS

[www.pnas.org](http://www.pnas.org)

Supplementary Information for

Cytocidal macrophages in symbiosis with CD4 and CD8 T cells cause acute diabetes following checkpoint blockade of PD-1 in NOD mice

Hao Hu<sup>1</sup>, Pavel N. Zakharov<sup>1</sup>, Orion J. Peterson<sup>1</sup>, Emil R. Unanue<sup>1,2</sup>  
Division of Immunobiology, Department of Pathology and Immunology, Washington University  
School of Medicine<sup>1</sup>

Corresponding author: [unanue@wustl.edu](mailto:unanue@wustl.edu)<sup>2</sup>

**This PDF file includes:**

Figures S1 to S7  
Tables S1 to S2

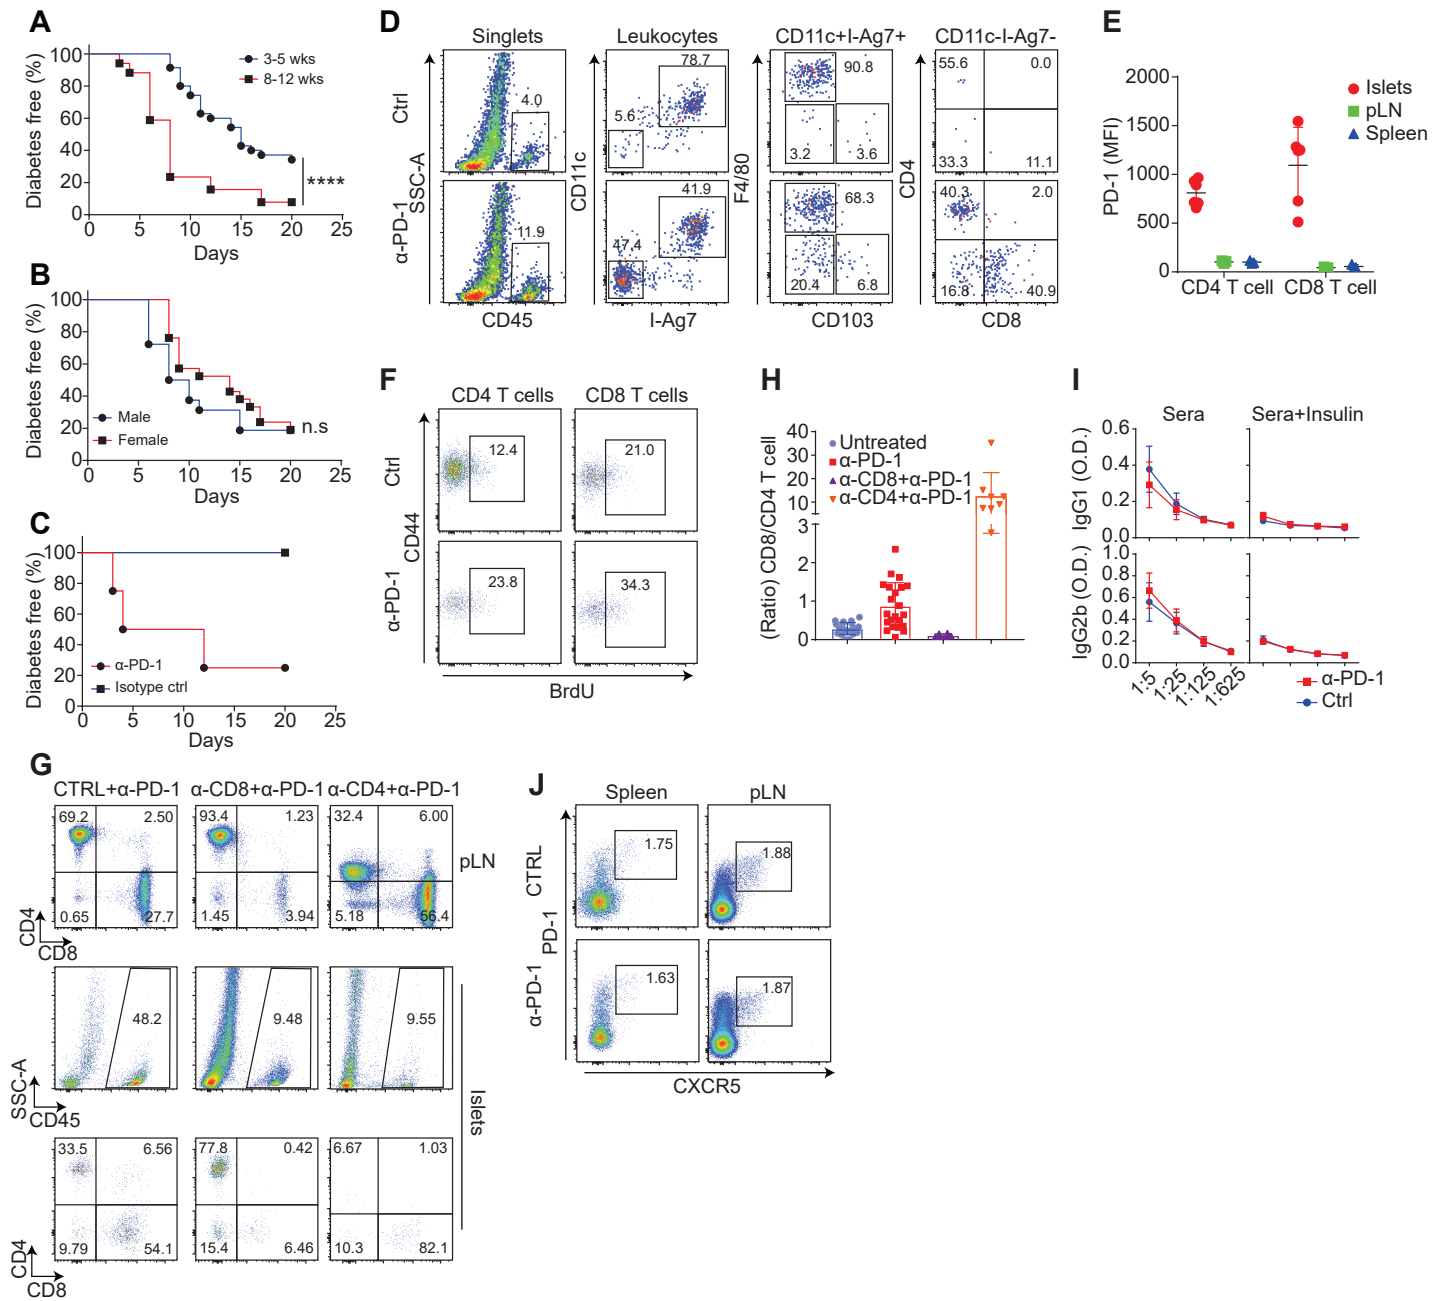

**Fig. S1 Checkpoint blockade and diabetes development**

**Fig. S1.** Checkpoint blockade and diabetes development. (A) Incidence of diabetes induced by anti-PD-1 in 3-5-week-old NOD female mice (n=35, blue) and 8-12-week-old NOD female mice (n=17, red). \*\*\*\*p<0.0001. Results are pooled from 3 independent experiments. (B) Incidence of diabetes induced by anti-PD-1 in NOD male mice (n=18, blue) and NOD female mice (n=21, red). Results are pooled from 3 independent experiments. (C) Incidence of diabetes induced by anti-PD-1 in >40-week-old NOD female mice. Mice were given one injection of anti-PD-1 (n=4, red) or isotype control antibody (n=4, blue). Experiment was performed one time. (D) Flow cytometry analysis of islet CD45+ leukocytes from NOD female mice treated with anti-PD-1 or isotype control antibody. (E) Mean Fluorescence Intensity of PD-1 expression in CD4 T cells and CD8 T cells from islets, pancreatic lymph nodes (pLN), and spleen of 8-week-old NOD female mice (n=5). Results are pooled from 2 independent experiments. (F) BrdU incorporation in CD4 T cells and CD8 T cells from islets of 8-week-old NOD female mice treated with or without anti-PD-1. BrdU (1mg/mouse) was administered every day during antibody treatment for 7 days. Result is representative of n=6 mice in each group from 2 independent experiments. (G) Flow cytometry analysis of CD4 T cells and CD8 T cells in pLN and islets after antibody treatment. 8-week-old NOD female mice were treated with three injections of anti-PD-1, anti-PD-1 plus anti-CD8, or anti-PD-1 plus anti-CD4. Data are representative of n=8 mice in each group from 2 independent experiments. (H) Ratio between CD8 T cells and CD4 T cells in islets in the indicated conditions from (G). Data from untreated mice and anti-PD-1 alone treatment are also incorporated. (I) Level of insulin autoantibody, IgG1 and IgG2b, in the serum of 8-week-old NOD female mice treated with (n=6) or without (n=5) anti-PD-1 measured by ELISA. Three injections of antibodies were administered every three days and one day after last injection the sera was collected, serially diluted, and examined by ELISA (Left). To determine the specificity one aliquot of sera was incubated with a 10-fold excess of insulin before measurement (Right). (J) Flow cytometry analysis of T follicular helper cells in spleen and pLN from 8-week-old NOD female mice treated with three injections of isotype control antibody or anti-PD-1 antibody. Result is representative of 2 independent experiments.

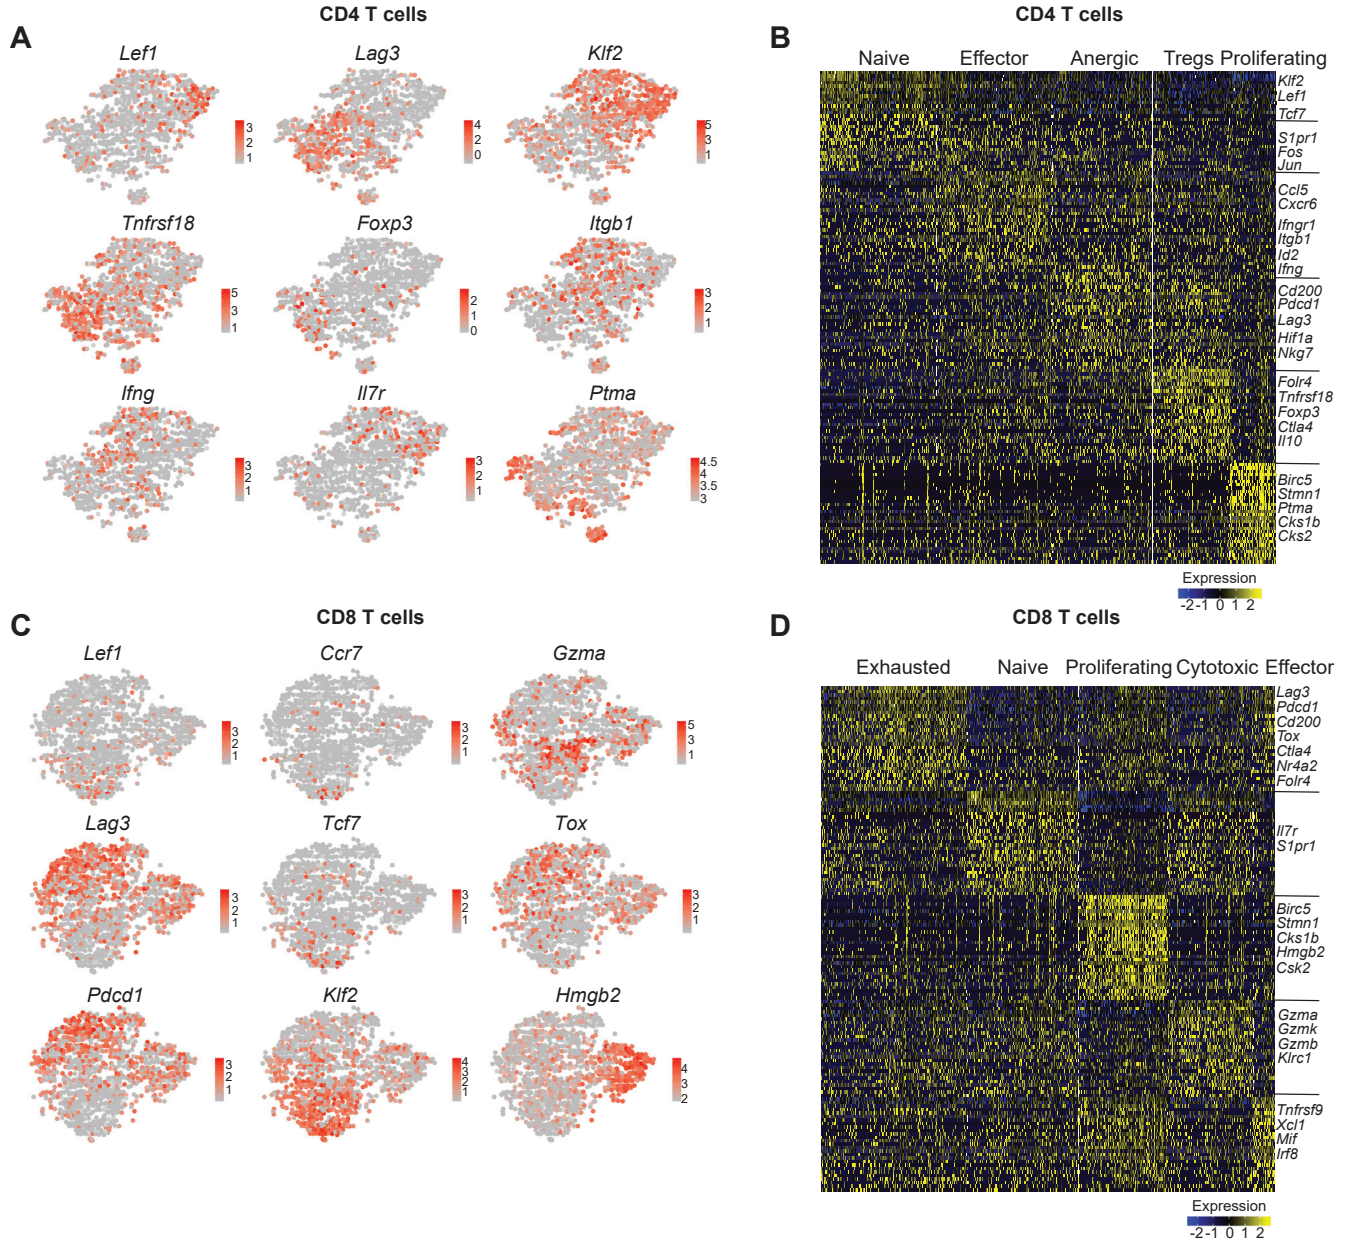

**Fig. S2 Single-cell RNA-seq analysis of islet infiltrating T cells**

**Fig. S2.** Single-cell RNA-seq analysis of islet infiltrating leukocytes. (A) Expression of marker genes in CD4 T cell clusters (see Fig. 3A). (B) Heatmap showing differentially expressed genes that characterize clusters of CD4 T cells. (C) Expression of marker genes in CD8 T cell clusters (see Fig. 3E). (D) Heatmap showing differentially expressed genes that characterize the clusters of CD8 T cells. For (B, D), differentially expressed genes with  $P_{\text{adj.}} < 0.05$  (Wilcoxon rank sum test) are shown. The data showed the combined cells from both anti-PD-1 and control mice.

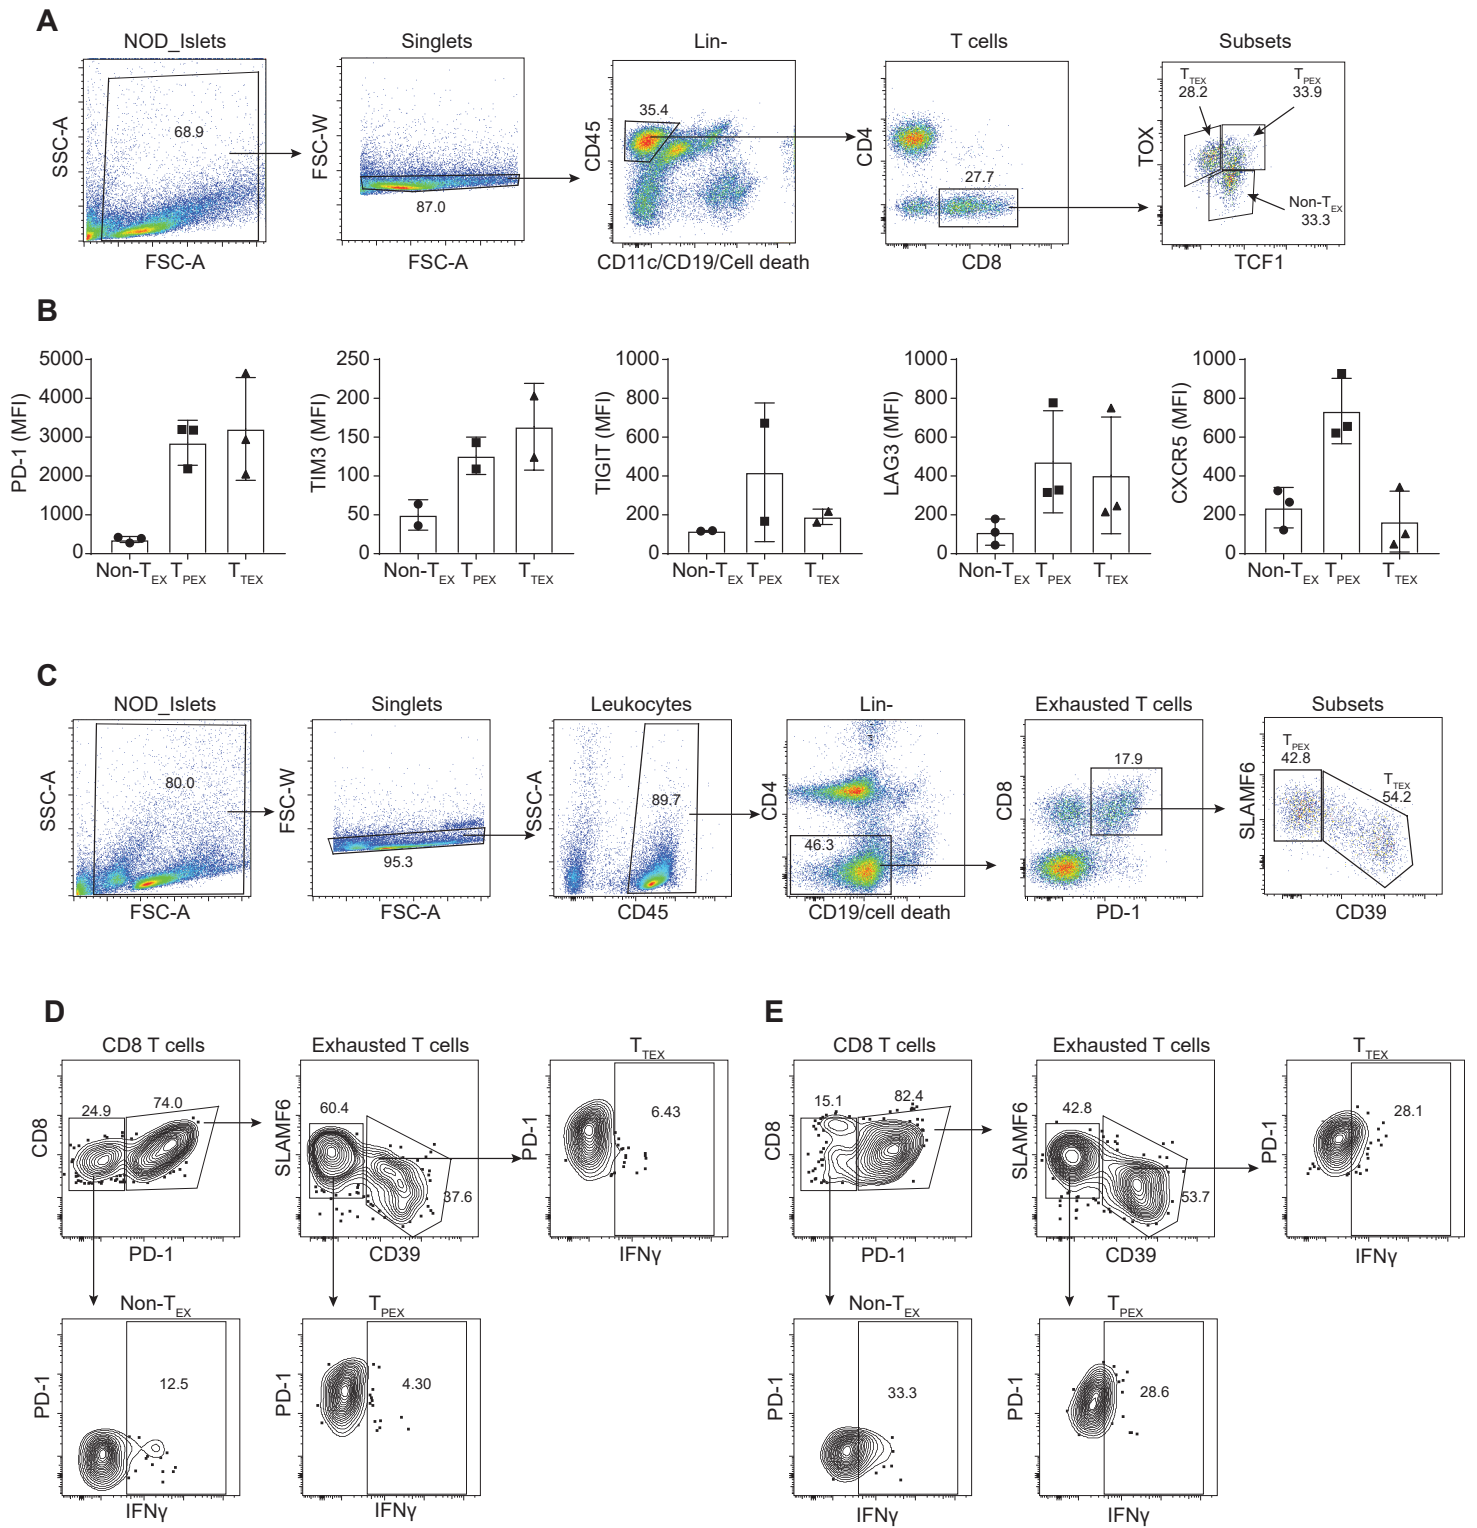

**Fig. S3 Identification of two subsets of exhausted CD8 T cells in islets**

**Fig. S3.** Identification of two subsets of exhausted CD8 T cells in islets. (A) Representative flow cytometry gating strategy to identify the two subsets of exhausted CD8 T cells based on TOX and TCF1 expression. Islets were isolated and examined from 10-week-old NOD mice. (B) Inhibitory molecules expressed by non-TEX, TPEX, and TTEX cells. Each data point indicates one experiment. (C) Representative flow cytometry gating strategy for the identification of exhausted CD8 T cells based on SLAMF6 and CD39 expression. (D) Gating strategy and expression of IFN $\gamma$  in TPEX cells, TTEX cells and non-TEX cells in islets as in Fig. 4 I and N (Ctrl group). Islets were isolated and restimulated with anti-CD3 (10 $\mu$ g/ml), anti-CD28 (5 $\mu$ g/ml), and brefeldin A for 4h before flow cytometry analysis. (E) Gating strategy and expression of IFN $\gamma$  in TPEX cells, TTEX cells and non-TEX cells in islets from 8-10-week-old female NOD mice treated with three injections of anti-PD-1. The islets are isolated one day after the third injection of anti-PD-1 as in Fig. 4N.

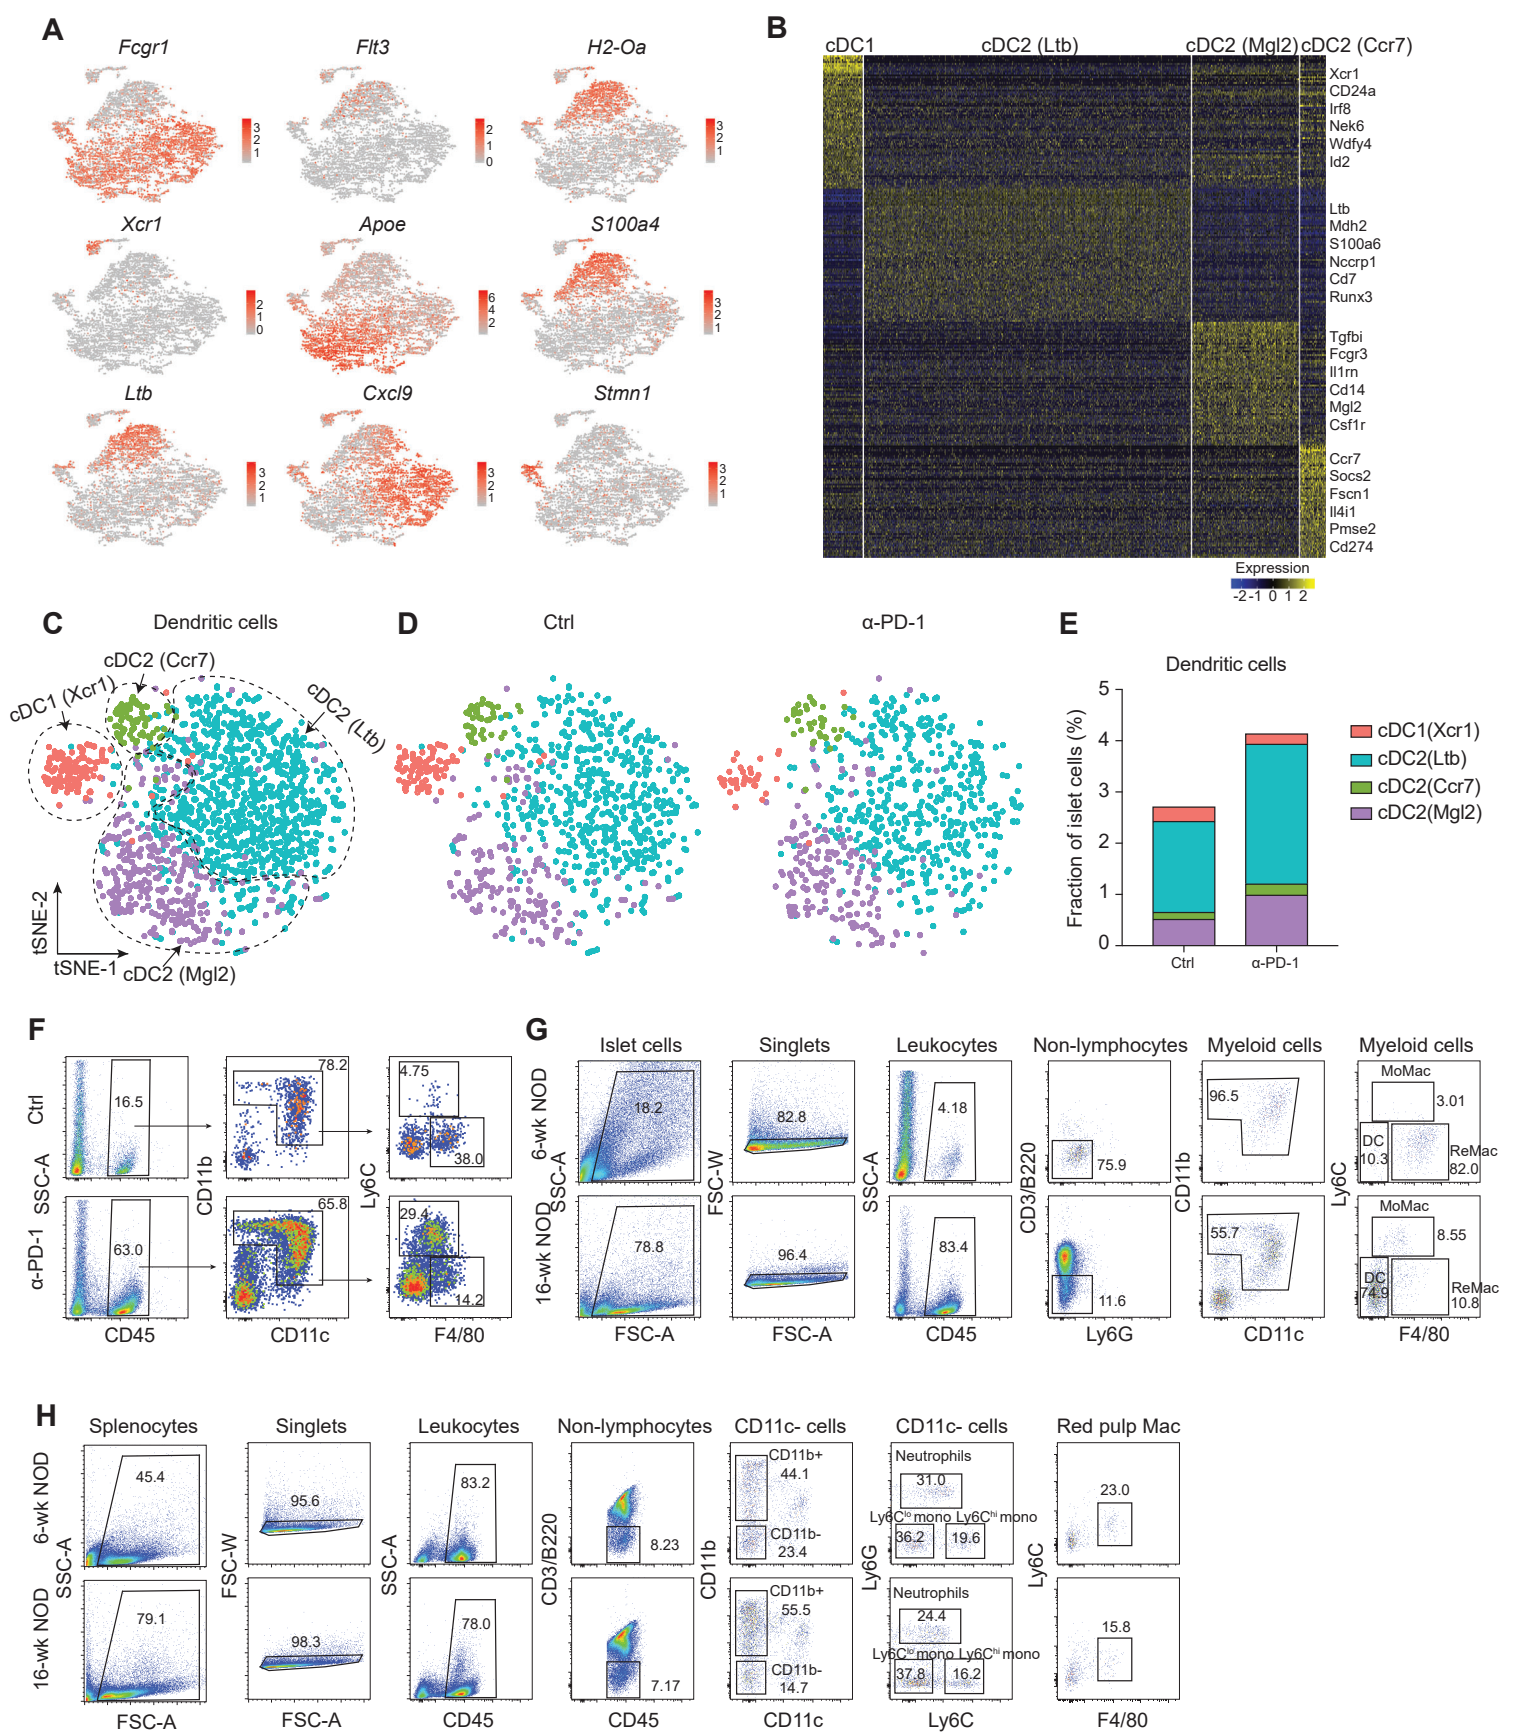

**Fig. S4 Identification of monocyte derived macrophages in islets following anti-PD-1 treatment and in islets from pre-diabetic NOD mice**



**Fig. S4.** Identification of monocyte derived macrophages in islets following anti-PD-1 treatment and in islets from pre-diabetic NOD mice. (A) t-SNE plots showing the expression of marker genes in myeloid cell clusters from Fig. 5A. (B) Heatmap showing differentially expressed genes that characterized clusters of dendritic cells ( $P$  adj.  $< 0.05$ , Wilcoxon rank sum test). (C) Combined t-SNE plot showing DCs obtained from 8-week-old untreated and anti-PD-1 treated NOD female mice, extracted from Fig. 5A. (D) t-SNE plot from panel (C) split by the two conditions. (E) Fraction of each cluster of dendritic cells relative to islet cells in the two conditions. (F) Flow cytometry gating strategy used in Fig. 5F for the identification of monocyte derived macrophages (MoMac) in islets from 8-week-old female NOD mice treated with or without three injections of anti-PD-1. (G) Representative flow cytometry procedure used for the identification of monocyte derived macrophages in islets from 6-week-old and 16-week-old NOD female mice. (H) Representative flow cytometry for the identification of different subsets of macrophages in spleen from 6-week-old and 16-week-old NOD female mice.

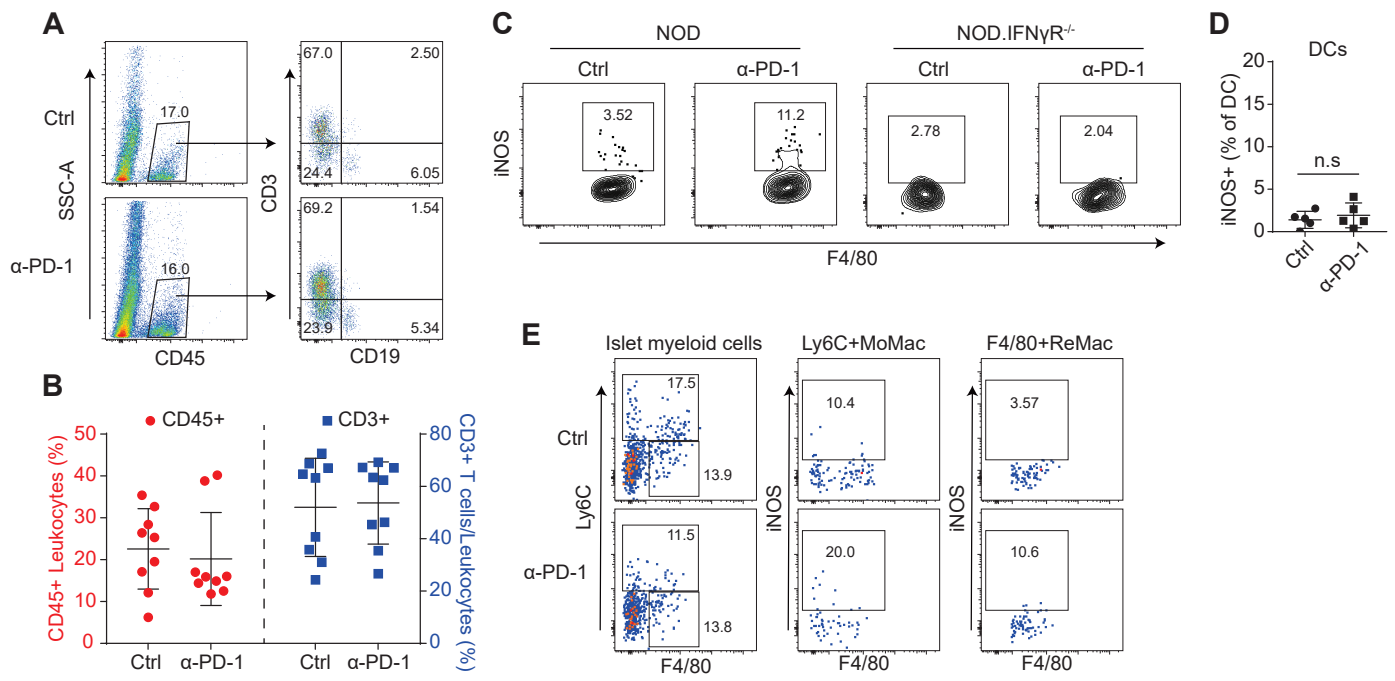

**Fig. S5 Monocyte derived macrophages are more pro-inflammatory compared with islet resident macrophages**

**Fig. S5.** Monocyte derived macrophages are more pro-inflammatory compared with islet resident macrophages. (A) Representative flow analysis showing the infiltration of the isolated islets from 10-12-week-old NOD female mice treated with or without anti-PD-1 (50 $\mu$ g/ml) in culture for 48h before analysis. Result is representative of 9 independent experiments. (B) Frequency of CD45+ leukocytes and CD3+ T cells in untreated or anti-PD-1 treated islets from (A). (C) Representative flow cytometry showing iNOS in islet macrophages from 10-12-week-old NOD or NOD.IFN $\gamma$ R $^{-/-}$  mice. (D) iNOS expression in DC from the untreated or anti-PD-1 treated islets. (E) Representative flow cytometry for Fig. 6 C-F.

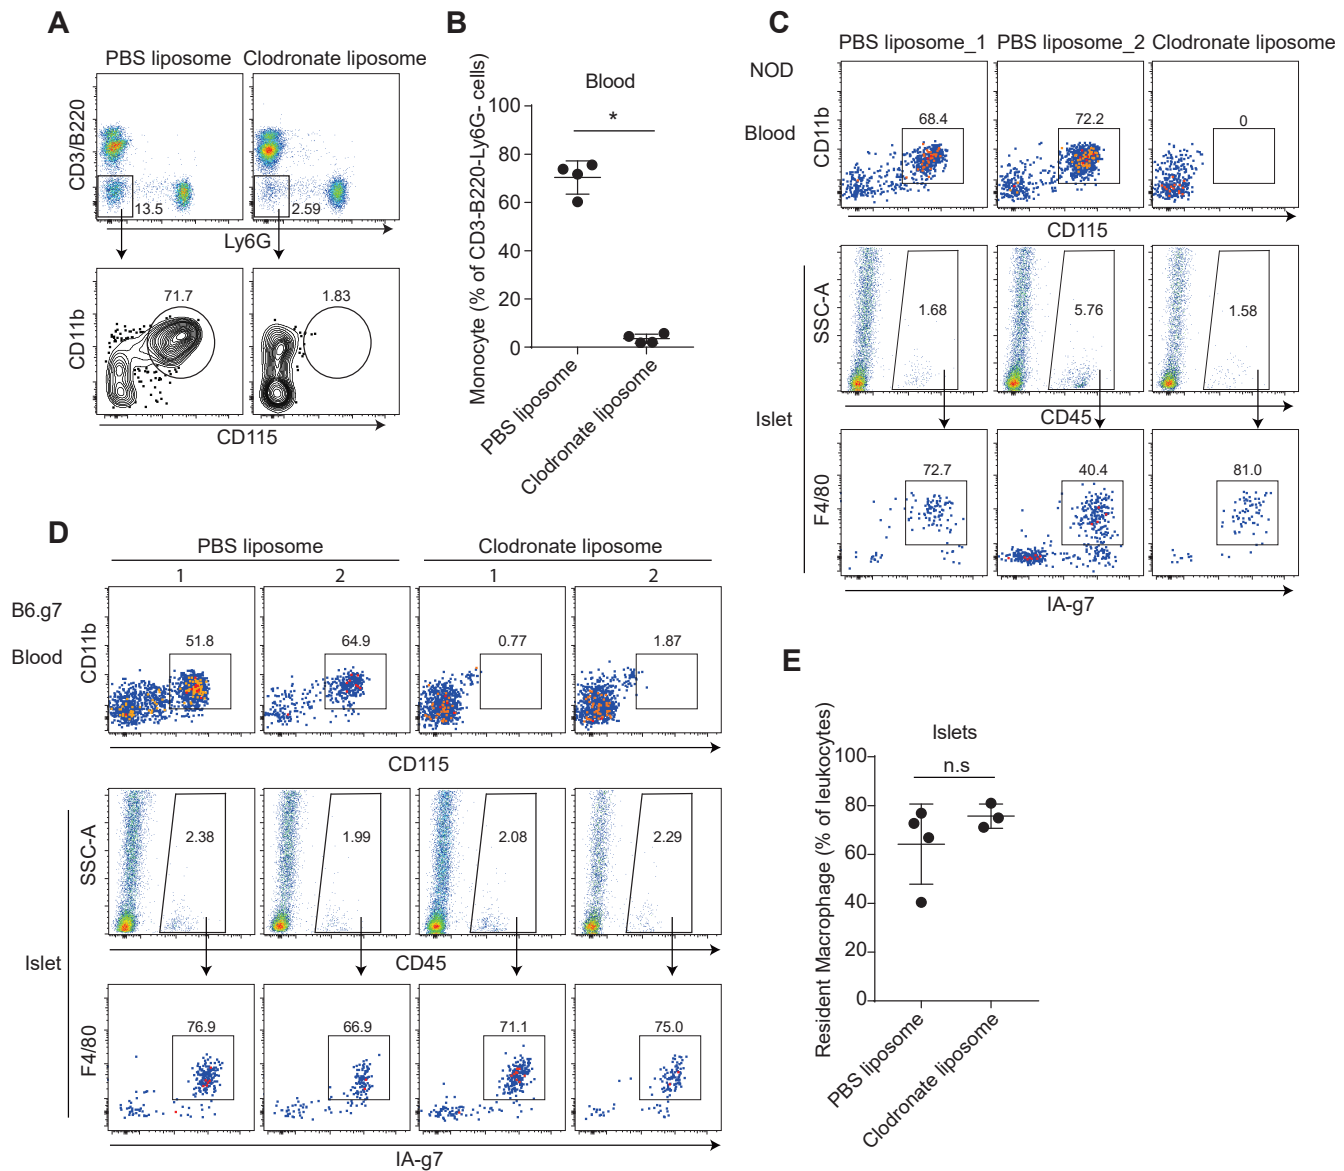

**Fig. S6 Clodronate liposome depletes monocytes in the circulation but not the resident macrophages in islets**

**Fig. S6.** Clodronate liposome depletes monocytes in the circulation but not the islet resident macrophages. (A) 8-week-old NOD mice were treated with 100 $\mu$ l/mouse PBS liposome (n=4) or clodronate liposome (n=4) intravenously and blood was collected one day after the injection. Graph shows the levels of monocytes in blood by flow cytometry in both conditions. (B) Percentage of blood monocytes as in (A). \*p=0.0286. The experiment was performed one time with four mice in each group. (C-E) Representative flow cytometry analysis showing the percentage of monocytes in blood and resident macrophages in 6-8-week-old NOD mice (C) or the non-diabetic strain B6.g7 mice (D) treated with PBS liposomes or clodronate liposomes. The results showing the percentage of resident macrophage in islets was pooled from NOD and B6.g7 mice (E). The experiment in (C-E) was performed once with all the mice shown in the figures.

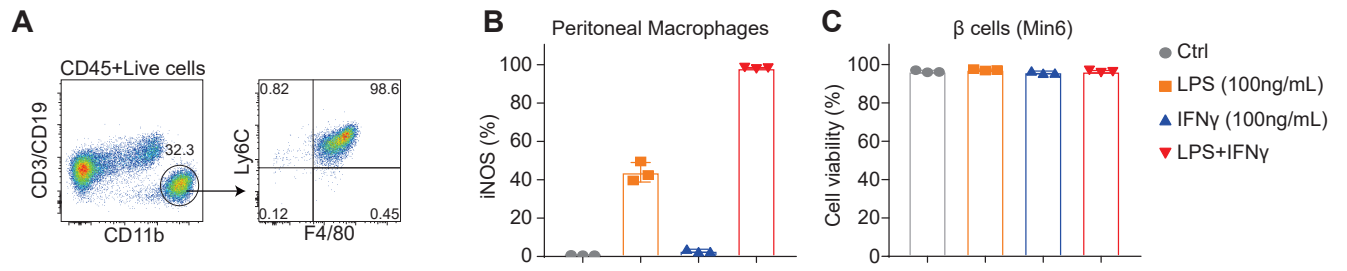

**Fig. S7 Activated macrophages acquire cytotoxic activity to  $\beta$  cells**

**Fig. S7.** Activated macrophages acquire cytotoxic activity to  $\beta$  cells. (A) Flow cytometry analysis of peritoneal macrophages from NOD mice. (B) Expression of iNOS (%) in macrophages treated with indicated stimuli for 18h ex vivo. Results are from n=3 mice for Fig. 8A. (C) Viability of  $\beta$  cell line (Min6) treated with indicated stimuli for 24h.  $\beta$  cell death was quantified by flow cytometry using cell viability dye.

**Table S1.** Gene expression signatures in CD4 T cell subsets

| Gene        | p_val    | avg_logFC | pct.1 | pct.2 | p_val_adj | cluster     |
|-------------|----------|-----------|-------|-------|-----------|-------------|
| Rps29       | 6.02E-70 | 0.54      | 1.00  | 1.00  | 2.02E-65  | CD4_0_Naive |
| Rps27       | 5.22E-67 | 0.56      | 1.00  | 0.99  | 1.75E-62  | CD4_0_Naive |
| Rps27rt     | 4.85E-54 | 0.54      | 1.00  | 0.97  | 1.62E-49  | CD4_0_Naive |
| Tmsb10      | 8.22E-54 | 0.57      | 1.00  | 0.96  | 2.75E-49  | CD4_0_Naive |
| <b>Klf2</b> | 6.19E-53 | 1.13      | 0.79  | 0.46  | 2.07E-48  | CD4_0_Naive |
| Rps16       | 9.59E-39 | 0.38      | 1.00  | 0.99  | 3.21E-34  | CD4_0_Naive |
| Rps28       | 1.30E-37 | 0.52      | 0.99  | 0.96  | 4.35E-33  | CD4_0_Naive |
| Rps19       | 5.86E-35 | 0.37      | 1.00  | 1.00  | 1.96E-30  | CD4_0_Naive |
| Rplp1       | 2.56E-30 | 0.42      | 0.98  | 0.95  | 8.57E-26  | CD4_0_Naive |
| Rpl12       | 3.82E-29 | 0.51      | 0.92  | 0.85  | 1.28E-24  | CD4_0_Naive |
| Rpl35a      | 1.08E-26 | 0.31      | 0.98  | 0.99  | 3.62E-22  | CD4_0_Naive |
| Rplp2       | 1.15E-26 | 0.34      | 0.98  | 0.97  | 3.83E-22  | CD4_0_Naive |
| Rps18       | 2.84E-25 | 0.27      | 0.99  | 0.99  | 9.51E-21  | CD4_0_Naive |
| Rps24       | 1.60E-23 | 0.33      | 0.99  | 0.98  | 5.36E-19  | CD4_0_Naive |
| Rpl8        | 3.49E-22 | 0.30      | 0.97  | 0.97  | 1.17E-17  | CD4_0_Naive |
| Rps15       | 5.24E-22 | 0.33      | 0.99  | 0.94  | 1.75E-17  | CD4_0_Naive |
| Rps27a      | 5.98E-21 | 0.26      | 0.99  | 0.97  | 2.00E-16  | CD4_0_Naive |
| <b>Lef1</b> | 3.96E-20 | 0.91      | 0.36  | 0.16  | 1.32E-15  | CD4_0_Naive |
| Rps21       | 4.44E-20 | 0.39      | 0.91  | 0.86  | 1.49E-15  | CD4_0_Naive |
| Rps7        | 8.78E-20 | 0.29      | 0.99  | 0.97  | 2.94E-15  | CD4_0_Naive |
| Rpl21       | 2.22E-18 | 0.30      | 0.96  | 0.93  | 7.42E-14  | CD4_0_Naive |
| Rpl14       | 5.00E-18 | 0.27      | 0.98  | 0.98  | 1.67E-13  | CD4_0_Naive |
| Uba52       | 9.05E-18 | 0.26      | 0.98  | 0.96  | 3.03E-13  | CD4_0_Naive |
| Rps20       | 3.06E-17 | 0.38      | 0.88  | 0.83  | 1.02E-12  | CD4_0_Naive |
| Rps18-ps3   | 4.70E-17 | 0.32      | 0.91  | 0.85  | 1.57E-12  | CD4_0_Naive |
| Rpl35       | 2.59E-16 | 0.29      | 0.99  | 0.96  | 8.67E-12  | CD4_0_Naive |
| Rps2        | 3.58E-16 | 0.29      | 0.96  | 0.91  | 1.20E-11  | CD4_0_Naive |
| Rps10       | 3.58E-16 | 0.29      | 0.95  | 0.93  | 1.20E-11  | CD4_0_Naive |
| Rps25       | 4.82E-15 | 0.30      | 0.92  | 0.88  | 1.61E-10  | CD4_0_Naive |
| Gm10260     | 2.25E-14 | 0.33      | 0.95  | 0.90  | 7.54E-10  | CD4_0_Naive |
| Rpl23a      | 2.68E-14 | 0.28      | 0.96  | 0.90  | 8.96E-10  | CD4_0_Naive |
| <b>Tcf7</b> | 1.20E-13 | 0.58      | 0.30  | 0.14  | 4.02E-09  | CD4_0_Naive |
| Rpl31       | 2.00E-13 | 0.31      | 0.88  | 0.86  | 6.68E-09  | CD4_0_Naive |
| Vps37b      | 3.03E-12 | 0.72      | 0.45  | 0.31  | 1.01E-07  | CD4_0_Naive |
| Rps8        | 3.84E-12 | 0.25      | 0.95  | 0.92  | 1.28E-07  | CD4_0_Naive |
| Dusp10      | 8.71E-12 | 0.79      | 0.26  | 0.13  | 2.91E-07  | CD4_0_Naive |
| Tsc22d3     | 9.88E-12 | 0.62      | 0.48  | 0.33  | 3.30E-07  | CD4_0_Naive |
| Txk         | 6.81E-11 | 0.74      | 0.35  | 0.21  | 2.28E-06  | CD4_0_Naive |
| Btg1        | 3.66E-10 | 0.27      | 0.98  | 0.91  | 1.22E-05  | CD4_0_Naive |
| Emb         | 5.09E-10 | 0.55      | 0.37  | 0.23  | 1.70E-05  | CD4_0_Naive |
| Rpl36a      | 5.19E-10 | 0.29      | 0.92  | 0.89  | 1.74E-05  | CD4_0_Naive |
| Wdr89       | 5.87E-10 | 0.37      | 0.79  | 0.74  | 1.96E-05  | CD4_0_Naive |
| Junb        | 7.76E-10 | 0.32      | 0.94  | 0.93  | 2.60E-05  | CD4_0_Naive |
| Rpl30       | 1.09E-09 | 0.27      | 0.85  | 0.83  | 3.66E-05  | CD4_0_Naive |
| Evl         | 5.96E-09 | 0.52      | 0.36  | 0.23  | 1.99E-04  | CD4_0_Naive |



|               |          |      |      |      |          |                |
|---------------|----------|------|------|------|----------|----------------|
| Gm9844        | 6.69E-09 | 0.55 | 0.42 | 0.29 | 2.24E-04 | CD4_0_Naive    |
| Rpl23a-ps3    | 1.28E-07 | 0.36 | 0.60 | 0.51 | 4.27E-03 | CD4_0_Naive    |
| Gm11808       | 5.60E-07 | 0.35 | 0.71 | 0.67 | 1.87E-02 | CD4_0_Naive    |
| Eef1g         | 1.08E-06 | 0.26 | 0.76 | 0.72 | 3.62E-02 | CD4_0_Naive    |
| <b>S1pr1</b>  | 1.16E-06 | 0.44 | 0.29 | 0.19 | 3.87E-02 | CD4_0_Naive    |
| <b>Ccl5</b>   | 1.63E-30 | 1.02 | 0.84 | 0.64 | 5.44E-26 | CD4_1_Effector |
| Ms4a4b        | 2.59E-26 | 0.56 | 0.87 | 0.62 | 8.67E-22 | CD4_1_Effector |
| Cxcr6         | 3.24E-20 | 0.49 | 0.64 | 0.36 | 1.08E-15 | CD4_1_Effector |
| <b>Cd52</b>   | 4.62E-19 | 0.37 | 0.97 | 0.93 | 1.54E-14 | CD4_1_Effector |
| Hopx          | 2.09E-16 | 0.53 | 0.29 | 0.11 | 7.00E-12 | CD4_1_Effector |
| <b>Ctla2a</b> | 2.92E-15 | 0.51 | 0.43 | 0.23 | 9.75E-11 | CD4_1_Effector |
| Actg1         | 1.56E-13 | 0.29 | 0.95 | 0.92 | 5.22E-09 | CD4_1_Effector |
| Selplg        | 1.27E-12 | 0.44 | 0.62 | 0.41 | 4.26E-08 | CD4_1_Effector |
| Ctsw          | 1.69E-12 | 0.40 | 0.48 | 0.28 | 5.65E-08 | CD4_1_Effector |
| S100a10       | 3.19E-12 | 0.35 | 0.82 | 0.69 | 1.07E-07 | CD4_1_Effector |
| Rgs1          | 6.82E-12 | 0.33 | 0.89 | 0.79 | 2.28E-07 | CD4_1_Effector |
| Cnot6l        | 9.59E-12 | 0.38 | 0.30 | 0.14 | 3.21E-07 | CD4_1_Effector |
| Lsp1          | 1.76E-11 | 0.40 | 0.66 | 0.50 | 5.88E-07 | CD4_1_Effector |
| S100a4        | 5.29E-11 | 0.40 | 0.50 | 0.32 | 1.77E-06 | CD4_1_Effector |
| Crip1         | 7.46E-11 | 0.28 | 0.90 | 0.80 | 2.50E-06 | CD4_1_Effector |
| Gzmk          | 1.78E-10 | 0.40 | 0.25 | 0.11 | 5.96E-06 | CD4_1_Effector |
| Dusp2         | 1.81E-10 | 0.47 | 0.52 | 0.34 | 6.05E-06 | CD4_1_Effector |
| Ccr2          | 2.40E-10 | 0.28 | 0.35 | 0.18 | 8.03E-06 | CD4_1_Effector |
| Epsti1        | 3.65E-10 | 0.42 | 0.34 | 0.18 | 1.22E-05 | CD4_1_Effector |
| S1pr4         | 4.19E-10 | 0.40 | 0.31 | 0.16 | 1.40E-05 | CD4_1_Effector |
| Ablim1        | 9.98E-10 | 0.37 | 0.43 | 0.26 | 3.34E-05 | CD4_1_Effector |
| Gramd3        | 2.68E-09 | 0.48 | 0.26 | 0.13 | 8.95E-05 | CD4_1_Effector |
| Hcst          | 1.49E-08 | 0.34 | 0.64 | 0.47 | 4.98E-04 | CD4_1_Effector |
| Ifngr1        | 1.96E-08 | 0.31 | 0.57 | 0.40 | 6.57E-04 | CD4_1_Effector |
| S100a6        | 2.19E-08 | 0.27 | 0.74 | 0.60 | 7.34E-04 | CD4_1_Effector |
| Smad7         | 3.34E-08 | 0.33 | 0.31 | 0.18 | 1.12E-03 | CD4_1_Effector |
| Runx3         | 6.17E-08 | 0.37 | 0.36 | 0.22 | 2.07E-03 | CD4_1_Effector |
| Zyx           | 7.38E-08 | 0.37 | 0.29 | 0.16 | 2.47E-03 | CD4_1_Effector |
| Itgb1         | 7.61E-08 | 0.37 | 0.43 | 0.28 | 2.55E-03 | CD4_1_Effector |
| Sp100         | 1.04E-07 | 0.26 | 0.40 | 0.25 | 3.47E-03 | CD4_1_Effector |
| Lgals3        | 1.23E-07 | 0.30 | 0.40 | 0.26 | 4.12E-03 | CD4_1_Effector |
| S100a11       | 1.30E-07 | 0.33 | 0.41 | 0.27 | 4.34E-03 | CD4_1_Effector |
| Ccnd3         | 1.74E-07 | 0.27 | 0.59 | 0.42 | 5.82E-03 | CD4_1_Effector |
| <b>Id2</b>    | 5.76E-07 | 0.37 | 0.61 | 0.50 | 1.93E-02 | CD4_1_Effector |
| <b>Ifng</b>   | 6.96E-07 | 0.35 | 0.32 | 0.19 | 2.33E-02 | CD4_1_Effector |
| <b>Cd200</b>  | 1.29E-29 | 0.93 | 0.61 | 0.32 | 4.30E-25 | CD4_2_Anergic  |
| <b>Pdcd1</b>  | 9.80E-25 | 0.86 | 0.49 | 0.22 | 3.28E-20 | CD4_2_Anergic  |
| Tbc1d4        | 1.41E-24 | 0.83 | 0.44 | 0.18 | 4.70E-20 | CD4_2_Anergic  |
| Cd82          | 9.04E-11 | 0.45 | 0.55 | 0.38 | 3.02E-06 | CD4_2_Anergic  |
| 2310001H17Rik | 5.73E-10 | 0.43 | 0.39 | 0.22 | 1.92E-05 | CD4_2_Anergic  |
| Eea1          | 2.05E-09 | 0.52 | 0.27 | 0.13 | 6.87E-05 | CD4_2_Anergic  |

|                 |          |      |      |      |          |               |
|-----------------|----------|------|------|------|----------|---------------|
| Sdf4            | 5.59E-09 | 0.40 | 0.64 | 0.48 | 1.87E-04 | CD4_2_Anergic |
| Gdi2            | 2.24E-08 | 0.37 | 0.69 | 0.57 | 7.49E-04 | CD4_2_Anergic |
| <b>Lag3</b>     | 2.73E-08 | 0.43 | 0.47 | 0.32 | 9.14E-04 | CD4_2_Anergic |
| Stx11           | 3.27E-08 | 0.47 | 0.35 | 0.22 | 1.10E-03 | CD4_2_Anergic |
| Ramp1           | 6.84E-08 | 0.52 | 0.48 | 0.35 | 2.29E-03 | CD4_2_Anergic |
| Rgs16           | 1.33E-07 | 0.47 | 0.46 | 0.33 | 4.44E-03 | CD4_2_Anergic |
| <b>Tnfrsf4</b>  | 1.23E-70 | 1.50 | 0.87 | 0.39 | 4.10E-66 | CD4_3_Treg    |
| <b>Ikzf2</b>    | 1.21E-56 | 1.26 | 0.80 | 0.35 | 4.06E-52 | CD4_3_Treg    |
| <b>Folr4</b>    | 1.43E-49 | 1.05 | 0.84 | 0.41 | 4.79E-45 | CD4_3_Treg    |
| <b>Tnfrsf18</b> | 1.55E-44 | 1.06 | 0.76 | 0.37 | 5.18E-40 | CD4_3_Treg    |
| Capg            | 1.90E-33 | 0.95 | 0.62 | 0.28 | 6.36E-29 | CD4_3_Treg    |
| AW112010        | 9.60E-33 | 0.58 | 0.99 | 0.92 | 3.21E-28 | CD4_3_Treg    |
| <b>Arl5a</b>    | 1.22E-32 | 0.95 | 0.53 | 0.19 | 4.09E-28 | CD4_3_Treg    |
| <b>Lag3</b>     | 2.48E-32 | 1.04 | 0.65 | 0.29 | 8.29E-28 | CD4_3_Treg    |
| Cd2             | 4.67E-32 | 0.77 | 0.85 | 0.54 | 1.56E-27 | CD4_3_Treg    |
| Sdf4            | 2.32E-31 | 0.90 | 0.76 | 0.47 | 7.75E-27 | CD4_3_Treg    |
| 1600014C10Rik   | 2.42E-28 | 0.94 | 0.60 | 0.28 | 8.08E-24 | CD4_3_Treg    |
| <b>Foxp3</b>    | 2.77E-27 | 0.72 | 0.31 | 0.07 | 9.27E-23 | CD4_3_Treg    |
| Srgn            | 2.86E-27 | 0.65 | 0.89 | 0.72 | 9.55E-23 | CD4_3_Treg    |
| <b>Ctla4</b>    | 1.59E-26 | 0.71 | 0.68 | 0.36 | 5.30E-22 | CD4_3_Treg    |
| <b>Il10</b>     | 3.02E-25 | 0.88 | 0.35 | 0.10 | 1.01E-20 | CD4_3_Treg    |
| Maf             | 7.20E-23 | 0.65 | 0.62 | 0.32 | 2.41E-18 | CD4_3_Treg    |
| Tnfrsf9         | 2.64E-22 | 1.01 | 0.35 | 0.12 | 8.85E-18 | CD4_3_Treg    |
| Samsn1          | 4.35E-21 | 0.75 | 0.59 | 0.32 | 1.45E-16 | CD4_3_Treg    |
| lfi27l2a        | 5.68E-20 | 0.57 | 0.93 | 0.72 | 1.90E-15 | CD4_3_Treg    |
| Crem            | 7.73E-20 | 0.72 | 0.43 | 0.18 | 2.59E-15 | CD4_3_Treg    |
| Pfn1            | 3.03E-17 | 0.29 | 1.00 | 1.00 | 1.01E-12 | CD4_3_Treg    |
| Ankrd55         | 1.40E-16 | 0.73 | 0.30 | 0.11 | 4.69E-12 | CD4_3_Treg    |
| Cd3e            | 5.69E-16 | 0.38 | 0.96 | 0.81 | 1.90E-11 | CD4_3_Treg    |
| Rgs1            | 6.40E-15 | 0.43 | 0.95 | 0.79 | 2.14E-10 | CD4_3_Treg    |
| Glrx            | 1.21E-14 | 0.61 | 0.47 | 0.24 | 4.03E-10 | CD4_3_Treg    |
| Ctsb            | 3.34E-14 | 0.57 | 0.64 | 0.46 | 1.12E-09 | CD4_3_Treg    |
| Pim1            | 5.88E-14 | 0.69 | 0.69 | 0.47 | 1.97E-09 | CD4_3_Treg    |
| Gm2a            | 1.66E-13 | 0.60 | 0.50 | 0.29 | 5.57E-09 | CD4_3_Treg    |
| Serpina3g       | 4.31E-13 | 0.65 | 0.29 | 0.12 | 1.44E-08 | CD4_3_Treg    |
| Bcl2a1b         | 6.55E-13 | 0.45 | 0.70 | 0.46 | 2.19E-08 | CD4_3_Treg    |
| Pkp3            | 7.61E-13 | 0.57 | 0.52 | 0.30 | 2.55E-08 | CD4_3_Treg    |
| Peli1           | 2.34E-12 | 0.46 | 0.64 | 0.44 | 7.83E-08 | CD4_3_Treg    |
| Gm14005         | 3.87E-12 | 0.54 | 0.32 | 0.14 | 1.29E-07 | CD4_3_Treg    |
| Cmtm7           | 8.14E-12 | 0.52 | 0.54 | 0.33 | 2.72E-07 | CD4_3_Treg    |
| Arpc2           | 8.78E-12 | 0.35 | 0.89 | 0.79 | 2.94E-07 | CD4_3_Treg    |
| Ptprcap         | 1.03E-11 | 0.40 | 0.80 | 0.64 | 3.43E-07 | CD4_3_Treg    |
| S100a6          | 1.53E-11 | 0.44 | 0.79 | 0.60 | 5.13E-07 | CD4_3_Treg    |
| Irf8            | 1.55E-11 | 0.72 | 0.36 | 0.18 | 5.18E-07 | CD4_3_Treg    |
| Gadd45b         | 3.48E-11 | 0.59 | 0.41 | 0.22 | 1.16E-06 | CD4_3_Treg    |
| Tnfrsf1b        | 4.58E-11 | 0.52 | 0.29 | 0.13 | 1.53E-06 | CD4_3_Treg    |
| Gimap7          | 5.58E-11 | 0.53 | 0.48 | 0.28 | 1.87E-06 | CD4_3_Treg    |

|               |           |      |      |      |           |                     |
|---------------|-----------|------|------|------|-----------|---------------------|
| Cd27          | 1.05E-10  | 0.45 | 0.57 | 0.38 | 3.52E-06  | CD4_3_Treg          |
| Mxd1          | 1.73E-10  | 0.44 | 0.28 | 0.12 | 5.80E-06  | CD4_3_Treg          |
| Rap1b         | 1.87E-10  | 0.41 | 0.77 | 0.63 | 6.27E-06  | CD4_3_Treg          |
| Ptp4a2        | 2.44E-10  | 0.50 | 0.60 | 0.42 | 8.17E-06  | CD4_3_Treg          |
| Cd3g          | 3.09E-10  | 0.32 | 0.94 | 0.88 | 1.03E-05  | CD4_3_Treg          |
| Fxyd5         | 3.20E-10  | 0.35 | 0.89 | 0.81 | 1.07E-05  | CD4_3_Treg          |
| Cyba          | 4.20E-10  | 0.34 | 0.82 | 0.70 | 1.41E-05  | CD4_3_Treg          |
| Cst7          | 6.20E-10  | 0.57 | 0.33 | 0.17 | 2.07E-05  | CD4_3_Treg          |
| Ighm          | 8.03E-10  | 0.64 | 0.52 | 0.35 | 2.69E-05  | CD4_3_Treg          |
| Lbh           | 1.10E-09  | 0.48 | 0.54 | 0.37 | 3.67E-05  | CD4_3_Treg          |
| Tank          | 2.65E-09  | 0.42 | 0.35 | 0.19 | 8.88E-05  | CD4_3_Treg          |
| Icos          | 2.95E-09  | 0.47 | 0.55 | 0.39 | 9.87E-05  | CD4_3_Treg          |
| Chchd10       | 4.08E-09  | 0.57 | 0.36 | 0.22 | 1.36E-04  | CD4_3_Treg          |
| Timp2         | 7.45E-09  | 0.46 | 0.32 | 0.17 | 2.49E-04  | CD4_3_Treg          |
| Pigx          | 8.99E-09  | 0.49 | 0.39 | 0.23 | 3.01E-04  | CD4_3_Treg          |
| Tigit         | 1.14E-08  | 0.50 | 0.29 | 0.15 | 3.82E-04  | CD4_3_Treg          |
| Spcs1         | 1.27E-08  | 0.40 | 0.60 | 0.44 | 4.24E-04  | CD4_3_Treg          |
| Shisa5        | 2.07E-08  | 0.26 | 0.92 | 0.86 | 6.92E-04  | CD4_3_Treg          |
| Lgals1        | 2.94E-08  | 0.27 | 0.90 | 0.74 | 9.85E-04  | CD4_3_Treg          |
| Prkch         | 6.86E-08  | 0.43 | 0.35 | 0.20 | 2.29E-03  | CD4_3_Treg          |
| Ccr2          | 1.10E-07  | 0.49 | 0.34 | 0.20 | 3.68E-03  | CD4_3_Treg          |
| Cd3d          | 1.12E-07  | 0.28 | 0.88 | 0.81 | 3.76E-03  | CD4_3_Treg          |
| Cd53          | 1.16E-07  | 0.38 | 0.76 | 0.66 | 3.87E-03  | CD4_3_Treg          |
| Cd6           | 1.57E-07  | 0.44 | 0.46 | 0.32 | 5.24E-03  | CD4_3_Treg          |
| Rnaset2a      | 2.75E-07  | 0.31 | 0.69 | 0.58 | 9.18E-03  | CD4_3_Treg          |
| Cd200         | 3.02E-07  | 0.45 | 0.51 | 0.36 | 1.01E-02  | CD4_3_Treg          |
| Sat1          | 3.70E-07  | 0.34 | 0.63 | 0.48 | 1.24E-02  | CD4_3_Treg          |
| Sept7         | 8.24E-07  | 0.34 | 0.60 | 0.46 | 2.76E-02  | CD4_3_Treg          |
| 2010111101Rik | 1.12E-06  | 0.37 | 0.28 | 0.15 | 3.76E-02  | CD4_3_Treg          |
| Itn2c         | 1.14E-06  | 0.37 | 0.39 | 0.24 | 3.80E-02  | CD4_3_Treg          |
| Lck           | 1.19E-06  | 0.29 | 0.81 | 0.73 | 3.98E-02  | CD4_3_Treg          |
| Snx2          | 1.36E-06  | 0.34 | 0.35 | 0.21 | 4.56E-02  | CD4_3_Treg          |
| 2810417H13Rik | 4.71E-113 | 1.99 | 0.84 | 0.11 | 1.58E-108 | CD4_4_Proliferating |
| <b>Birc5</b>  | 1.08E-104 | 1.62 | 0.68 | 0.06 | 3.61E-100 | CD4_4_Proliferating |
| Rrm2          | 8.08E-99  | 1.72 | 0.64 | 0.06 | 2.70E-94  | CD4_4_Proliferating |
| <b>Stmn1</b>  | 1.05E-98  | 1.79 | 0.79 | 0.12 | 3.51E-94  | CD4_4_Proliferating |
| Asf1b         | 7.90E-89  | 1.09 | 0.57 | 0.05 | 2.64E-84  | CD4_4_Proliferating |
| Nusap1        | 2.13E-85  | 1.10 | 0.48 | 0.03 | 7.12E-81  | CD4_4_Proliferating |
| Spc24         | 4.67E-81  | 1.02 | 0.50 | 0.04 | 1.56E-76  | CD4_4_Proliferating |
| Ccna2         | 2.92E-78  | 1.04 | 0.49 | 0.04 | 9.76E-74  | CD4_4_Proliferating |
| Smc2          | 3.72E-77  | 1.10 | 0.64 | 0.08 | 1.24E-72  | CD4_4_Proliferating |
| Hist1h2ap     | 1.39E-75  | 1.84 | 0.57 | 0.07 | 4.66E-71  | CD4_4_Proliferating |
| Fbxo5         | 2.68E-72  | 0.77 | 0.39 | 0.02 | 8.98E-68  | CD4_4_Proliferating |
| Ube2c         | 6.38E-70  | 1.48 | 0.52 | 0.06 | 2.13E-65  | CD4_4_Proliferating |
| Top2a         | 1.12E-69  | 1.16 | 0.64 | 0.09 | 3.74E-65  | CD4_4_Proliferating |
| Cdca8         | 1.96E-66  | 0.83 | 0.46 | 0.04 | 6.57E-62  | CD4_4_Proliferating |
| Tuba1b        | 9.80E-66  | 1.65 | 0.85 | 0.27 | 3.28E-61  | CD4_4_Proliferating |

|               |          |      |      |      |          |                     |
|---------------|----------|------|------|------|----------|---------------------|
| Cks1b         | 4.86E-62 | 1.12 | 0.58 | 0.09 | 1.62E-57 | CD4_4_Proliferating |
| <b>H2afz</b>  | 5.70E-62 | 1.30 | 0.98 | 0.76 | 1.91E-57 | CD4_4_Proliferating |
| Sgol1         | 5.28E-60 | 0.56 | 0.30 | 0.01 | 1.77E-55 | CD4_4_Proliferating |
| Pbk           | 1.13E-59 | 0.63 | 0.32 | 0.02 | 3.78E-55 | CD4_4_Proliferating |
| Cdk1          | 1.85E-59 | 0.81 | 0.39 | 0.03 | 6.19E-55 | CD4_4_Proliferating |
| Tk1           | 7.84E-59 | 0.75 | 0.41 | 0.04 | 2.62E-54 | CD4_4_Proliferating |
| Aurkb         | 2.48E-58 | 0.56 | 0.30 | 0.01 | 8.30E-54 | CD4_4_Proliferating |
| Cks2          | 7.30E-57 | 1.28 | 0.66 | 0.14 | 2.44E-52 | CD4_4_Proliferating |
| Ptma          | 9.68E-57 | 0.95 | 0.99 | 0.93 | 3.24E-52 | CD4_4_Proliferating |
| Ccnb1         | 6.31E-56 | 0.75 | 0.34 | 0.02 | 2.11E-51 | CD4_4_Proliferating |
| Cenpf         | 8.74E-55 | 0.65 | 0.28 | 0.01 | 2.92E-50 | CD4_4_Proliferating |
| Ccnb2         | 9.95E-55 | 0.74 | 0.41 | 0.04 | 3.33E-50 | CD4_4_Proliferating |
| Spc25         | 6.36E-53 | 0.67 | 0.36 | 0.03 | 2.13E-48 | CD4_4_Proliferating |
| Hmgb2         | 1.64E-52 | 1.41 | 0.93 | 0.61 | 5.50E-48 | CD4_4_Proliferating |
| Mxd3          | 4.18E-52 | 0.55 | 0.25 | 0.01 | 1.40E-47 | CD4_4_Proliferating |
| Tyms          | 7.80E-52 | 0.97 | 0.50 | 0.08 | 2.61E-47 | CD4_4_Proliferating |
| Cdca3         | 9.93E-49 | 0.58 | 0.32 | 0.03 | 3.32E-44 | CD4_4_Proliferating |
| Mki67         | 2.53E-48 | 0.71 | 0.35 | 0.03 | 8.48E-44 | CD4_4_Proliferating |
| Tubb5         | 2.08E-46 | 1.43 | 0.87 | 0.48 | 6.96E-42 | CD4_4_Proliferating |
| Tipin         | 1.07E-44 | 1.03 | 0.63 | 0.15 | 3.59E-40 | CD4_4_Proliferating |
| Pttg1         | 1.48E-44 | 1.15 | 0.53 | 0.11 | 4.95E-40 | CD4_4_Proliferating |
| Aurka         | 1.12E-43 | 0.46 | 0.25 | 0.02 | 3.75E-39 | CD4_4_Proliferating |
| Cdc20         | 3.79E-43 | 0.92 | 0.32 | 0.03 | 1.27E-38 | CD4_4_Proliferating |
| Tpx2          | 4.73E-43 | 0.52 | 0.25 | 0.02 | 1.58E-38 | CD4_4_Proliferating |
| Dut           | 1.41E-42 | 1.04 | 0.69 | 0.19 | 4.71E-38 | CD4_4_Proliferating |
| 2700094K13Rik | 2.94E-42 | 1.04 | 0.72 | 0.22 | 9.85E-38 | CD4_4_Proliferating |
| 1190002F15Rik | 4.25E-42 | 0.74 | 0.43 | 0.06 | 1.42E-37 | CD4_4_Proliferating |
| H2afx         | 1.78E-41 | 1.04 | 0.55 | 0.12 | 5.96E-37 | CD4_4_Proliferating |
| Ran           | 2.43E-41 | 1.03 | 0.91 | 0.51 | 8.12E-37 | CD4_4_Proliferating |
| Gmnn          | 3.14E-41 | 0.76 | 0.43 | 0.07 | 1.05E-36 | CD4_4_Proliferating |
| Tacc3         | 6.41E-41 | 0.58 | 0.29 | 0.03 | 2.15E-36 | CD4_4_Proliferating |
| Mad2l1        | 1.15E-40 | 0.57 | 0.40 | 0.06 | 3.84E-36 | CD4_4_Proliferating |
| Hmgn2         | 1.45E-40 | 1.25 | 0.80 | 0.36 | 4.87E-36 | CD4_4_Proliferating |
| Rad51         | 1.58E-40 | 0.43 | 0.29 | 0.03 | 5.30E-36 | CD4_4_Proliferating |
| Lig1          | 2.43E-40 | 0.79 | 0.45 | 0.08 | 8.14E-36 | CD4_4_Proliferating |
| Clspn         | 2.55E-40 | 0.53 | 0.26 | 0.02 | 8.55E-36 | CD4_4_Proliferating |
| Cenpa         | 1.07E-38 | 1.10 | 0.57 | 0.14 | 3.59E-34 | CD4_4_Proliferating |
| Cep55         | 3.89E-38 | 0.42 | 0.27 | 0.03 | 1.30E-33 | CD4_4_Proliferating |
| Ppia          | 5.27E-38 | 0.62 | 0.99 | 0.96 | 1.76E-33 | CD4_4_Proliferating |
| Knstrn        | 7.66E-38 | 0.60 | 0.29 | 0.03 | 2.56E-33 | CD4_4_Proliferating |
| Hmgb3         | 3.51E-37 | 0.50 | 0.39 | 0.06 | 1.17E-32 | CD4_4_Proliferating |
| Apitd1        | 1.64E-36 | 0.59 | 0.30 | 0.04 | 5.48E-32 | CD4_4_Proliferating |
| Cenpm         | 1.02E-35 | 0.54 | 0.32 | 0.04 | 3.43E-31 | CD4_4_Proliferating |
| Mcm5          | 1.48E-35 | 0.69 | 0.38 | 0.06 | 4.95E-31 | CD4_4_Proliferating |
| Prc1          | 3.09E-35 | 0.45 | 0.27 | 0.03 | 1.03E-30 | CD4_4_Proliferating |
| Kpna2         | 3.88E-35 | 0.78 | 0.34 | 0.05 | 1.30E-30 | CD4_4_Proliferating |
| Fen1          | 2.23E-34 | 0.59 | 0.35 | 0.05 | 7.47E-30 | CD4_4_Proliferating |
| Tmpo          | 3.38E-34 | 0.81 | 0.58 | 0.16 | 1.13E-29 | CD4_4_Proliferating |

|          |          |      |      |      |          |                     |
|----------|----------|------|------|------|----------|---------------------|
| Cenpw    | 7.06E-34 | 0.60 | 0.34 | 0.05 | 2.36E-29 | CD4_4_Proliferating |
| Rfc5     | 1.13E-33 | 0.63 | 0.37 | 0.06 | 3.78E-29 | CD4_4_Proliferating |
| Smc4     | 7.23E-33 | 0.84 | 0.72 | 0.23 | 2.42E-28 | CD4_4_Proliferating |
| Ccdc34   | 2.07E-32 | 0.54 | 0.29 | 0.04 | 6.91E-28 | CD4_4_Proliferating |
| Dek      | 8.85E-32 | 0.92 | 0.74 | 0.30 | 2.96E-27 | CD4_4_Proliferating |
| Slbp     | 8.38E-30 | 0.92 | 0.72 | 0.29 | 2.80E-25 | CD4_4_Proliferating |
| Hells    | 1.95E-29 | 0.54 | 0.31 | 0.05 | 6.51E-25 | CD4_4_Proliferating |
| Mcm3     | 7.57E-29 | 0.59 | 0.31 | 0.05 | 2.53E-24 | CD4_4_Proliferating |
| Siva1    | 7.87E-29 | 0.65 | 0.50 | 0.13 | 2.63E-24 | CD4_4_Proliferating |
| Banf1    | 1.32E-28 | 0.74 | 0.56 | 0.16 | 4.43E-24 | CD4_4_Proliferating |
| Ybx1     | 5.04E-28 | 0.74 | 0.92 | 0.67 | 1.69E-23 | CD4_4_Proliferating |
| Plk4     | 1.84E-26 | 0.46 | 0.27 | 0.04 | 6.14E-22 | CD4_4_Proliferating |
| Pmf1     | 3.29E-26 | 0.51 | 0.35 | 0.07 | 1.10E-21 | CD4_4_Proliferating |
| Orc6     | 5.72E-26 | 0.51 | 0.32 | 0.06 | 1.91E-21 | CD4_4_Proliferating |
| Gm10282  | 6.19E-26 | 0.55 | 0.34 | 0.07 | 2.07E-21 | CD4_4_Proliferating |
| Prim1    | 7.46E-26 | 0.38 | 0.26 | 0.04 | 2.49E-21 | CD4_4_Proliferating |
| Lsm2     | 8.60E-26 | 0.65 | 0.56 | 0.17 | 2.88E-21 | CD4_4_Proliferating |
| Snrpd1   | 1.17E-24 | 0.66 | 0.70 | 0.27 | 3.90E-20 | CD4_4_Proliferating |
| Cmc2     | 1.24E-24 | 0.40 | 0.40 | 0.09 | 4.14E-20 | CD4_4_Proliferating |
| Erh      | 1.52E-24 | 0.77 | 0.88 | 0.50 | 5.07E-20 | CD4_4_Proliferating |
| Phgdh    | 2.15E-24 | 0.64 | 0.39 | 0.09 | 7.21E-20 | CD4_4_Proliferating |
| Hmgb1    | 3.65E-24 | 0.76 | 0.85 | 0.74 | 1.22E-19 | CD4_4_Proliferating |
| Bub3     | 3.69E-24 | 0.68 | 0.63 | 0.22 | 1.23E-19 | CD4_4_Proliferating |
| Ranbp1   | 4.90E-24 | 0.79 | 0.83 | 0.44 | 1.64E-19 | CD4_4_Proliferating |
| Hnrnpab  | 1.09E-23 | 0.66 | 0.68 | 0.26 | 3.63E-19 | CD4_4_Proliferating |
| Rfc4     | 2.21E-23 | 0.45 | 0.29 | 0.06 | 7.41E-19 | CD4_4_Proliferating |
| Dtymk    | 3.01E-23 | 0.61 | 0.44 | 0.12 | 1.01E-18 | CD4_4_Proliferating |
| Nap111   | 1.25E-22 | 0.75 | 0.69 | 0.30 | 4.18E-18 | CD4_4_Proliferating |
| Csrp1    | 2.81E-22 | 0.47 | 0.41 | 0.11 | 9.42E-18 | CD4_4_Proliferating |
| Anp32b   | 4.00E-22 | 0.76 | 0.75 | 0.41 | 1.34E-17 | CD4_4_Proliferating |
| Mcm7     | 4.43E-22 | 0.50 | 0.34 | 0.08 | 1.48E-17 | CD4_4_Proliferating |
| Cdkn2c   | 5.48E-22 | 0.62 | 0.39 | 0.11 | 1.83E-17 | CD4_4_Proliferating |
| Pcna-ps2 | 6.24E-22 | 0.55 | 0.34 | 0.08 | 2.09E-17 | CD4_4_Proliferating |
| Ezh2     | 1.07E-21 | 0.65 | 0.43 | 0.12 | 3.58E-17 | CD4_4_Proliferating |
| Gins2    | 1.37E-21 | 0.42 | 0.25 | 0.04 | 4.57E-17 | CD4_4_Proliferating |
| H2afv    | 1.44E-21 | 0.73 | 0.73 | 0.34 | 4.82E-17 | CD4_4_Proliferating |
| Nucks1   | 5.07E-21 | 0.71 | 0.52 | 0.18 | 1.70E-16 | CD4_4_Proliferating |
| Dnmt1    | 5.46E-21 | 0.44 | 0.29 | 0.06 | 1.83E-16 | CD4_4_Proliferating |
| Nrm      | 1.40E-20 | 0.29 | 0.28 | 0.06 | 4.69E-16 | CD4_4_Proliferating |
| Rpa3     | 4.07E-20 | 0.56 | 0.53 | 0.19 | 1.36E-15 | CD4_4_Proliferating |
| Tex30    | 5.77E-20 | 0.34 | 0.30 | 0.07 | 1.93E-15 | CD4_4_Proliferating |
| Lmnb1    | 7.01E-20 | 0.56 | 0.51 | 0.17 | 2.34E-15 | CD4_4_Proliferating |
| Tubb4b   | 1.20E-19 | 0.68 | 0.43 | 0.13 | 4.00E-15 | CD4_4_Proliferating |
| Dctpp1   | 1.58E-19 | 0.57 | 0.51 | 0.18 | 5.30E-15 | CD4_4_Proliferating |
| Fkbp2    | 2.05E-19 | 0.48 | 0.44 | 0.13 | 6.85E-15 | CD4_4_Proliferating |
| Pcna     | 6.84E-19 | 0.67 | 0.49 | 0.18 | 2.29E-14 | CD4_4_Proliferating |
| Fxn      | 1.19E-18 | 0.32 | 0.28 | 0.06 | 3.97E-14 | CD4_4_Proliferating |
| Impdh2   | 1.51E-18 | 0.46 | 0.43 | 0.13 | 5.06E-14 | CD4_4_Proliferating |

|         |          |      |      |      |          |                     |
|---------|----------|------|------|------|----------|---------------------|
| Lgals1  | 1.61E-18 | 0.66 | 0.92 | 0.75 | 5.39E-14 | CD4_4_Proliferating |
| Ssb     | 1.70E-18 | 0.59 | 0.64 | 0.26 | 5.69E-14 | CD4_4_Proliferating |
| Rbbp7   | 2.30E-18 | 0.56 | 0.58 | 0.23 | 7.69E-14 | CD4_4_Proliferating |
| Dnajc9  | 5.86E-18 | 0.54 | 0.62 | 0.25 | 1.96E-13 | CD4_4_Proliferating |
| Anapc15 | 7.30E-18 | 0.49 | 0.32 | 0.08 | 2.44E-13 | CD4_4_Proliferating |
| Rbm3    | 7.37E-18 | 0.54 | 0.87 | 0.72 | 2.47E-13 | CD4_4_Proliferating |
| Nasp    | 8.99E-18 | 0.36 | 0.36 | 0.10 | 3.01E-13 | CD4_4_Proliferating |
| Hat1    | 1.05E-17 | 0.52 | 0.33 | 0.09 | 3.52E-13 | CD4_4_Proliferating |
| Lsm5    | 1.87E-17 | 0.64 | 0.73 | 0.36 | 6.26E-13 | CD4_4_Proliferating |
| Cdk4    | 3.61E-17 | 0.54 | 0.52 | 0.20 | 1.21E-12 | CD4_4_Proliferating |
| Pgp     | 4.13E-17 | 0.42 | 0.35 | 0.10 | 1.38E-12 | CD4_4_Proliferating |
| Txn1    | 5.24E-17 | 0.59 | 0.80 | 0.45 | 1.75E-12 | CD4_4_Proliferating |
| Mis18a  | 6.38E-17 | 0.41 | 0.41 | 0.13 | 2.13E-12 | CD4_4_Proliferating |
| Nudt21  | 1.03E-16 | 0.57 | 0.71 | 0.35 | 3.45E-12 | CD4_4_Proliferating |
| Ly6e    | 1.20E-16 | 0.64 | 0.77 | 0.45 | 4.02E-12 | CD4_4_Proliferating |
| Cisd1   | 1.38E-16 | 0.48 | 0.44 | 0.15 | 4.61E-12 | CD4_4_Proliferating |
| Usp1    | 1.46E-16 | 0.35 | 0.39 | 0.12 | 4.88E-12 | CD4_4_Proliferating |
| Cmtm7   | 1.55E-16 | 0.67 | 0.66 | 0.33 | 5.19E-12 | CD4_4_Proliferating |
| Smc6    | 1.98E-16 | 0.53 | 0.58 | 0.25 | 6.62E-12 | CD4_4_Proliferating |
| Hnrnpa3 | 2.26E-16 | 0.57 | 0.83 | 0.56 | 7.58E-12 | CD4_4_Proliferating |
| Smc3    | 2.61E-16 | 0.48 | 0.39 | 0.12 | 8.74E-12 | CD4_4_Proliferating |
| Actl6a  | 2.83E-16 | 0.51 | 0.40 | 0.13 | 9.46E-12 | CD4_4_Proliferating |
| Hint1   | 3.09E-16 | 0.58 | 0.84 | 0.58 | 1.03E-11 | CD4_4_Proliferating |
| Lsm3    | 4.02E-16 | 0.42 | 0.62 | 0.25 | 1.34E-11 | CD4_4_Proliferating |
| Alyref  | 4.14E-16 | 0.45 | 0.54 | 0.21 | 1.39E-11 | CD4_4_Proliferating |
| Anp32e  | 4.33E-16 | 0.56 | 0.48 | 0.18 | 1.45E-11 | CD4_4_Proliferating |
| Tpi1    | 6.20E-16 | 0.47 | 0.37 | 0.12 | 2.08E-11 | CD4_4_Proliferating |
| Snrpe   | 7.48E-16 | 0.55 | 0.81 | 0.51 | 2.50E-11 | CD4_4_Proliferating |
| Cdkn2d  | 1.14E-15 | 0.40 | 0.43 | 0.14 | 3.83E-11 | CD4_4_Proliferating |
| Dck     | 1.16E-15 | 0.34 | 0.26 | 0.06 | 3.88E-11 | CD4_4_Proliferating |
| Ssrp1   | 1.20E-15 | 0.42 | 0.51 | 0.19 | 4.03E-11 | CD4_4_Proliferating |
| Elof1   | 1.33E-15 | 0.52 | 0.46 | 0.16 | 4.43E-11 | CD4_4_Proliferating |
| Nhp2    | 2.57E-15 | 0.52 | 0.56 | 0.22 | 8.59E-11 | CD4_4_Proliferating |
| Lyar    | 3.17E-15 | 0.54 | 0.40 | 0.14 | 1.06E-10 | CD4_4_Proliferating |
| Slc25a5 | 3.26E-15 | 0.57 | 0.88 | 0.59 | 1.09E-10 | CD4_4_Proliferating |
| Rtn3    | 4.28E-15 | 0.50 | 0.52 | 0.20 | 1.43E-10 | CD4_4_Proliferating |
| Pold2   | 5.95E-15 | 0.42 | 0.31 | 0.09 | 1.99E-10 | CD4_4_Proliferating |
| Ddx39   | 6.12E-15 | 0.49 | 0.45 | 0.16 | 2.05E-10 | CD4_4_Proliferating |
| Naa50   | 6.77E-15 | 0.35 | 0.49 | 0.18 | 2.27E-10 | CD4_4_Proliferating |
| Ube2s   | 8.78E-15 | 0.75 | 0.64 | 0.35 | 2.94E-10 | CD4_4_Proliferating |
| Rpp30   | 8.84E-15 | 0.25 | 0.26 | 0.06 | 2.96E-10 | CD4_4_Proliferating |
| Psma6   | 9.98E-15 | 0.43 | 0.58 | 0.24 | 3.34E-10 | CD4_4_Proliferating |
| Eif1ax  | 1.08E-14 | 0.51 | 0.58 | 0.24 | 3.62E-10 | CD4_4_Proliferating |
| Lsm6    | 1.23E-14 | 0.57 | 0.69 | 0.33 | 4.10E-10 | CD4_4_Proliferating |
| Eri1    | 1.27E-14 | 0.36 | 0.34 | 0.11 | 4.27E-10 | CD4_4_Proliferating |
| Srsf7   | 1.48E-14 | 0.58 | 0.71 | 0.36 | 4.97E-10 | CD4_4_Proliferating |
| Mif     | 1.59E-14 | 0.66 | 0.81 | 0.50 | 5.32E-10 | CD4_4_Proliferating |
| Fabp5   | 2.03E-14 | 0.47 | 0.29 | 0.08 | 6.80E-10 | CD4_4_Proliferating |

|               |          |      |      |      |          |                     |
|---------------|----------|------|------|------|----------|---------------------|
| Gapdh         | 2.11E-14 | 0.53 | 0.85 | 0.63 | 7.07E-10 | CD4_4_Proliferating |
| Hmgn5         | 2.54E-14 | 0.28 | 0.26 | 0.07 | 8.49E-10 | CD4_4_Proliferating |
| Cox5a         | 2.74E-14 | 0.56 | 0.83 | 0.53 | 9.17E-10 | CD4_4_Proliferating |
| Uchl5         | 2.99E-14 | 0.37 | 0.39 | 0.13 | 9.99E-10 | CD4_4_Proliferating |
| Prdx3         | 3.03E-14 | 0.31 | 0.43 | 0.15 | 1.01E-09 | CD4_4_Proliferating |
| Mcm6          | 3.09E-14 | 0.29 | 0.43 | 0.15 | 1.03E-09 | CD4_4_Proliferating |
| Rad21         | 4.54E-14 | 0.36 | 0.33 | 0.10 | 1.52E-09 | CD4_4_Proliferating |
| Sdf2l1        | 4.63E-14 | 0.50 | 0.55 | 0.23 | 1.55E-09 | CD4_4_Proliferating |
| Srsf2         | 4.68E-14 | 0.53 | 0.76 | 0.43 | 1.56E-09 | CD4_4_Proliferating |
| Vdac1         | 5.01E-14 | 0.39 | 0.42 | 0.15 | 1.68E-09 | CD4_4_Proliferating |
| Prdx1         | 5.01E-14 | 0.50 | 0.90 | 0.74 | 1.68E-09 | CD4_4_Proliferating |
| Prdx4         | 5.04E-14 | 0.39 | 0.29 | 0.09 | 1.69E-09 | CD4_4_Proliferating |
| Srsf3         | 8.70E-14 | 0.54 | 0.80 | 0.54 | 2.91E-09 | CD4_4_Proliferating |
| Aars          | 8.78E-14 | 0.34 | 0.35 | 0.11 | 2.94E-09 | CD4_4_Proliferating |
| Rpa2          | 1.18E-13 | 0.43 | 0.36 | 0.13 | 3.95E-09 | CD4_4_Proliferating |
| Mrpl42        | 1.27E-13 | 0.44 | 0.57 | 0.25 | 4.26E-09 | CD4_4_Proliferating |
| Pum2          | 1.45E-13 | 0.37 | 0.40 | 0.14 | 4.87E-09 | CD4_4_Proliferating |
| Uchl3         | 1.51E-13 | 0.26 | 0.40 | 0.14 | 5.04E-09 | CD4_4_Proliferating |
| Hsp90aa1      | 1.63E-13 | 0.50 | 0.86 | 0.56 | 5.46E-09 | CD4_4_Proliferating |
| Rfc2          | 4.53E-13 | 0.34 | 0.42 | 0.16 | 1.52E-08 | CD4_4_Proliferating |
| Ncaph2        | 6.65E-13 | 0.30 | 0.32 | 0.10 | 2.22E-08 | CD4_4_Proliferating |
| Nans          | 1.12E-12 | 0.49 | 0.44 | 0.18 | 3.76E-08 | CD4_4_Proliferating |
| Dbi           | 1.29E-12 | 0.45 | 0.57 | 0.25 | 4.31E-08 | CD4_4_Proliferating |
| Dnajc2        | 1.34E-12 | 0.48 | 0.38 | 0.14 | 4.48E-08 | CD4_4_Proliferating |
| Arl6ip6       | 1.57E-12 | 0.28 | 0.36 | 0.12 | 5.25E-08 | CD4_4_Proliferating |
| Rexo2         | 1.71E-12 | 0.47 | 0.64 | 0.31 | 5.72E-08 | CD4_4_Proliferating |
| Sumo2         | 2.01E-12 | 0.38 | 0.91 | 0.80 | 6.71E-08 | CD4_4_Proliferating |
| Cyb5b         | 2.17E-12 | 0.37 | 0.34 | 0.12 | 7.27E-08 | CD4_4_Proliferating |
| Cbx3          | 2.30E-12 | 0.49 | 0.67 | 0.37 | 7.71E-08 | CD4_4_Proliferating |
| Acsl5         | 2.76E-12 | 0.27 | 0.34 | 0.12 | 9.25E-08 | CD4_4_Proliferating |
| Stra13        | 2.81E-12 | 0.44 | 0.56 | 0.26 | 9.40E-08 | CD4_4_Proliferating |
| Nudcd2        | 2.97E-12 | 0.38 | 0.40 | 0.15 | 9.93E-08 | CD4_4_Proliferating |
| Dpy30         | 4.24E-12 | 0.47 | 0.50 | 0.22 | 1.42E-07 | CD4_4_Proliferating |
| Nudt5         | 4.69E-12 | 0.47 | 0.34 | 0.12 | 1.57E-07 | CD4_4_Proliferating |
| Hmgn1         | 4.89E-12 | 0.56 | 0.52 | 0.25 | 1.64E-07 | CD4_4_Proliferating |
| 2700029M09Rik | 5.92E-12 | 0.31 | 0.44 | 0.18 | 1.98E-07 | CD4_4_Proliferating |
| Psmc3         | 7.15E-12 | 0.34 | 0.49 | 0.20 | 2.39E-07 | CD4_4_Proliferating |
| Ube2m         | 7.47E-12 | 0.34 | 0.36 | 0.13 | 2.50E-07 | CD4_4_Proliferating |
| Cbx1          | 1.05E-11 | 0.35 | 0.44 | 0.18 | 3.50E-07 | CD4_4_Proliferating |
| U2af1         | 1.16E-11 | 0.47 | 0.67 | 0.35 | 3.88E-07 | CD4_4_Proliferating |
| Eny2          | 1.23E-11 | 0.34 | 0.50 | 0.22 | 4.11E-07 | CD4_4_Proliferating |

**Table S2.** Gene expression signatures in CD8 T cell subsets

| gene            | p_val    | avg_logFC | pct.1 | pct.2 | p_val_adj | cluster         |
|-----------------|----------|-----------|-------|-------|-----------|-----------------|
| <b>Lag3</b>     | 2.15E-63 | 0.89      | 0.74  | 0.41  | 7.20E-59  | CD8_0_Exhausted |
| <b>Pdcd1</b>    | 4.95E-52 | 0.86      | 0.66  | 0.36  | 1.66E-47  | CD8_0_Exhausted |
| <i>Cxcr6</i>    | 1.57E-40 | 0.63      | 0.86  | 0.68  | 5.24E-36  | CD8_0_Exhausted |
| <i>Cd3g</i>     | 3.43E-40 | 0.45      | 0.98  | 0.93  | 1.15E-35  | CD8_0_Exhausted |
| <i>Rgs16</i>    | 6.01E-37 | 0.66      | 0.72  | 0.44  | 2.01E-32  | CD8_0_Exhausted |
| <i>Nkg7</i>     | 5.27E-34 | 0.37      | 0.99  | 0.97  | 1.76E-29  | CD8_0_Exhausted |
| <i>Cd3e</i>     | 8.15E-34 | 0.37      | 0.96  | 0.87  | 2.73E-29  | CD8_0_Exhausted |
| <i>Cd8a</i>     | 1.65E-33 | 0.51      | 0.84  | 0.69  | 5.52E-29  | CD8_0_Exhausted |
| <b>Cd200</b>    | 2.36E-24 | 0.60      | 0.53  | 0.32  | 7.89E-20  | CD8_0_Exhausted |
| <b>Tox</b>      | 2.37E-23 | 0.55      | 0.52  | 0.32  | 7.92E-19  | CD8_0_Exhausted |
| <i>Cd3d</i>     | 5.80E-21 | 0.28      | 0.95  | 0.88  | 1.94E-16  | CD8_0_Exhausted |
| <i>Ucp2</i>     | 7.19E-21 | 0.36      | 0.78  | 0.64  | 2.40E-16  | CD8_0_Exhausted |
| <i>AW112010</i> | 8.21E-21 | 0.27      | 0.99  | 0.98  | 2.75E-16  | CD8_0_Exhausted |
| <i>Ccl4</i>     | 1.28E-20 | 0.61      | 0.82  | 0.70  | 4.29E-16  | CD8_0_Exhausted |
| <i>Bcl2a1d</i>  | 3.12E-20 | 0.45      | 0.60  | 0.42  | 1.04E-15  | CD8_0_Exhausted |
| <i>Ccl3</i>     | 8.10E-19 | 0.82      | 0.54  | 0.36  | 2.71E-14  | CD8_0_Exhausted |
| <i>Batf</i>     | 8.72E-19 | 0.51      | 0.55  | 0.38  | 2.92E-14  | CD8_0_Exhausted |
| <i>Sh2d2a</i>   | 4.33E-18 | 0.43      | 0.67  | 0.50  | 1.45E-13  | CD8_0_Exhausted |
| <i>Bcl2a1b</i>  | 8.44E-18 | 0.37      | 0.77  | 0.63  | 2.82E-13  | CD8_0_Exhausted |
| <i>S100a6</i>   | 3.04E-16 | 0.34      | 0.86  | 0.73  | 1.02E-11  | CD8_0_Exhausted |
| <i>Sub1</i>     | 3.22E-16 | 0.26      | 0.99  | 0.96  | 1.08E-11  | CD8_0_Exhausted |
| <i>lfi272a</i>  | 1.79E-15 | 0.37      | 0.83  | 0.67  | 6.00E-11  | CD8_0_Exhausted |
| <i>Trbc2</i>    | 2.57E-14 | 0.27      | 0.92  | 0.86  | 8.58E-10  | CD8_0_Exhausted |
| <b>Cd160</b>    | 6.33E-14 | 0.44      | 0.32  | 0.18  | 2.12E-09  | CD8_0_Exhausted |
| <i>Mxd4</i>     | 1.79E-13 | 0.39      | 0.32  | 0.18  | 5.98E-09  | CD8_0_Exhausted |
| <i>Rbpj</i>     | 2.87E-13 | 0.41      | 0.37  | 0.23  | 9.59E-09  | CD8_0_Exhausted |
| <i>Capg</i>     | 5.13E-13 | 0.45      | 0.36  | 0.22  | 1.72E-08  | CD8_0_Exhausted |
| <i>Ptms</i>     | 9.55E-13 | 0.37      | 0.54  | 0.40  | 3.19E-08  | CD8_0_Exhausted |
| <b>Ctla4</b>    | 1.87E-12 | 0.42      | 0.48  | 0.34  | 6.25E-08  | CD8_0_Exhausted |
| <i>Samsn1</i>   | 2.25E-12 | 0.42      | 0.45  | 0.32  | 7.54E-08  | CD8_0_Exhausted |
| <i>BC021614</i> | 3.80E-12 | 0.36      | 0.43  | 0.29  | 1.27E-07  | CD8_0_Exhausted |
| <i>Klrd1</i>    | 4.02E-12 | 0.43      | 0.68  | 0.58  | 1.35E-07  | CD8_0_Exhausted |
| <i>Gdi2</i>     | 8.68E-12 | 0.29      | 0.78  | 0.68  | 2.90E-07  | CD8_0_Exhausted |
| <i>Cst7</i>     | 9.29E-12 | 0.36      | 0.49  | 0.37  | 3.11E-07  | CD8_0_Exhausted |
| <i>Nr4a2</i>    | 9.88E-12 | 0.40      | 0.42  | 0.29  | 3.31E-07  | CD8_0_Exhausted |
| <i>Rap1a</i>    | 2.17E-11 | 0.28      | 0.73  | 0.62  | 7.25E-07  | CD8_0_Exhausted |
| <i>Cd27</i>     | 3.08E-11 | 0.26      | 0.63  | 0.50  | 1.03E-06  | CD8_0_Exhausted |
| <b>Folr4</b>    | 3.36E-11 | 0.40      | 0.29  | 0.17  | 1.12E-06  | CD8_0_Exhausted |
| <i>Fas</i>      | 5.86E-11 | 0.39      | 0.35  | 0.22  | 1.96E-06  | CD8_0_Exhausted |
| <i>Ciapin1</i>  | 8.15E-11 | 0.33      | 0.50  | 0.36  | 2.73E-06  | CD8_0_Exhausted |
| <i>Ech1</i>     | 9.85E-11 | 0.32      | 0.54  | 0.41  | 3.29E-06  | CD8_0_Exhausted |
| <i>Zap70</i>    | 9.86E-11 | 0.34      | 0.51  | 0.39  | 3.30E-06  | CD8_0_Exhausted |
| <i>Ramp1</i>    | 1.50E-10 | 0.36      | 0.29  | 0.18  | 5.03E-06  | CD8_0_Exhausted |
| <i>Ikzf3</i>    | 2.07E-10 | 0.33      | 0.43  | 0.30  | 6.94E-06  | CD8_0_Exhausted |
| <i>Pold4</i>    | 4.17E-10 | 0.28      | 0.36  | 0.24  | 1.40E-05  | CD8_0_Exhausted |



|                  |          |      |      |      |          |                 |
|------------------|----------|------|------|------|----------|-----------------|
| <i>Il2rb</i>     | 6.88E-10 | 0.30 | 0.47 | 0.35 | 2.30E-05 | CD8_0_Exhausted |
| <i>Trac</i>      | 7.38E-10 | 0.29 | 0.72 | 0.61 | 2.47E-05 | CD8_0_Exhausted |
| <i>Elk3</i>      | 9.22E-10 | 0.32 | 0.43 | 0.31 | 3.08E-05 | CD8_0_Exhausted |
| <i>Litaf</i>     | 1.22E-09 | 0.37 | 0.37 | 0.25 | 4.09E-05 | CD8_0_Exhausted |
| <i>Cd7</i>       | 3.57E-09 | 0.42 | 0.61 | 0.51 | 1.19E-04 | CD8_0_Exhausted |
| <i>Tnfrsf9</i>   | 4.21E-09 | 0.36 | 0.33 | 0.21 | 1.41E-04 | CD8_0_Exhausted |
| <i>S100a4</i>    | 1.28E-08 | 0.37 | 0.52 | 0.41 | 4.28E-04 | CD8_0_Exhausted |
| <i>Ctsb</i>      | 1.31E-08 | 0.27 | 0.66 | 0.55 | 4.39E-04 | CD8_0_Exhausted |
| <i>Ppp1r16b</i>  | 2.46E-08 | 0.30 | 0.43 | 0.32 | 8.23E-04 | CD8_0_Exhausted |
| <i>Pld3</i>      | 3.09E-08 | 0.26 | 0.35 | 0.24 | 1.03E-03 | CD8_0_Exhausted |
| <i>Sdf4</i>      | 3.67E-08 | 0.38 | 0.54 | 0.44 | 1.23E-03 | CD8_0_Exhausted |
| <i>Crem</i>      | 4.37E-08 | 0.30 | 0.27 | 0.17 | 1.46E-03 | CD8_0_Exhausted |
| <i>Ndfip1</i>    | 4.65E-08 | 0.27 | 0.56 | 0.44 | 1.56E-03 | CD8_0_Exhausted |
| <i>Id2</i>       | 8.63E-08 | 0.27 | 0.80 | 0.74 | 2.89E-03 | CD8_0_Exhausted |
| <i>Ccl5</i>      | 1.08E-07 | 0.29 | 0.99 | 0.97 | 3.61E-03 | CD8_0_Exhausted |
| <i>Chmp4b</i>    | 4.96E-07 | 0.26 | 0.50 | 0.41 | 1.66E-02 | CD8_0_Exhausted |
| <i>Vamp5</i>     | 1.07E-06 | 0.28 | 0.30 | 0.21 | 3.57E-02 | CD8_0_Exhausted |
| <i>Rps27</i>     | 2.04E-92 | 0.53 | 1.00 | 0.99 | 6.81E-88 | CD8_1_Naive     |
| <i>Rps27rt</i>   | 2.19E-77 | 0.54 | 1.00 | 0.97 | 7.33E-73 | CD8_1_Naive     |
| <i>Tmsb10</i>    | 9.63E-73 | 0.67 | 1.00 | 0.96 | 3.22E-68 | CD8_1_Naive     |
| <b>Klf2</b>      | 2.30E-71 | 1.16 | 0.78 | 0.42 | 7.68E-67 | CD8_1_Naive     |
| <i>Malat1</i>    | 2.71E-48 | 0.42 | 1.00 | 1.00 | 9.07E-44 | CD8_1_Naive     |
| <i>Rpl13a</i>    | 1.41E-43 | 0.29 | 1.00 | 1.00 | 4.72E-39 | CD8_1_Naive     |
| <i>Rps29</i>     | 8.11E-42 | 0.31 | 1.00 | 1.00 | 2.71E-37 | CD8_1_Naive     |
| <i>Rps14</i>     | 1.19E-41 | 0.28 | 1.00 | 1.00 | 3.99E-37 | CD8_1_Naive     |
| <i>Btg1</i>      | 3.39E-38 | 0.44 | 0.97 | 0.92 | 1.13E-33 | CD8_1_Naive     |
| <i>Rps24</i>     | 4.51E-37 | 0.29 | 0.99 | 0.99 | 1.51E-32 | CD8_1_Naive     |
| <i>Rps28</i>     | 1.18E-30 | 0.34 | 0.99 | 0.98 | 3.94E-26 | CD8_1_Naive     |
| <i>Il7r</i>      | 2.88E-29 | 0.67 | 0.26 | 0.07 | 9.64E-25 | CD8_1_Naive     |
| <b>Tcf7</b>      | 5.21E-29 | 0.56 | 0.27 | 0.08 | 1.74E-24 | CD8_1_Naive     |
| <i>Rpl21</i>     | 6.83E-24 | 0.28 | 0.97 | 0.95 | 2.28E-19 | CD8_1_Naive     |
| <i>Gramd3</i>    | 1.98E-21 | 0.57 | 0.38 | 0.18 | 6.63E-17 | CD8_1_Naive     |
| <i>S1pr1</i>     | 1.40E-20 | 0.51 | 0.32 | 0.13 | 4.67E-16 | CD8_1_Naive     |
| <i>Rplp1</i>     | 2.20E-19 | 0.27 | 0.99 | 0.97 | 7.35E-15 | CD8_1_Naive     |
| <i>Rpl12</i>     | 2.10E-18 | 0.30 | 0.92 | 0.89 | 7.02E-14 | CD8_1_Naive     |
| <i>Rps21</i>     | 3.88E-18 | 0.33 | 0.92 | 0.88 | 1.30E-13 | CD8_1_Naive     |
| <i>Evl</i>       | 1.27E-17 | 0.51 | 0.48 | 0.29 | 4.24E-13 | CD8_1_Naive     |
| <i>Rps18-ps3</i> | 1.71E-16 | 0.28 | 0.94 | 0.89 | 5.72E-12 | CD8_1_Naive     |
| <i>Hcst</i>      | 3.85E-13 | 0.35 | 0.71 | 0.61 | 1.29E-08 | CD8_1_Naive     |
| <i>Gm9843</i>    | 9.30E-13 | 0.28 | 0.86 | 0.82 | 3.11E-08 | CD8_1_Naive     |
| <i>Ssh2</i>      | 1.97E-12 | 0.41 | 0.31 | 0.17 | 6.59E-08 | CD8_1_Naive     |
| <i>Dnajb1</i>    | 1.99E-12 | 0.47 | 0.58 | 0.46 | 6.66E-08 | CD8_1_Naive     |
| <i>Ly6a</i>      | 1.03E-11 | 0.31 | 0.82 | 0.78 | 3.45E-07 | CD8_1_Naive     |
| <i>Junb</i>      | 1.33E-11 | 0.31 | 0.96 | 0.93 | 4.46E-07 | CD8_1_Naive     |
| <i>Ptpn18</i>    | 3.80E-11 | 0.34 | 0.70 | 0.63 | 1.27E-06 | CD8_1_Naive     |
| <i>Tsc22d3</i>   | 5.26E-11 | 0.50 | 0.45 | 0.32 | 1.76E-06 | CD8_1_Naive     |
| <i>Gm11808</i>   | 6.10E-11 | 0.33 | 0.77 | 0.74 | 2.04E-06 | CD8_1_Naive     |

|                      |           |      |      |      |           |                     |
|----------------------|-----------|------|------|------|-----------|---------------------|
| <i>Hspa1b</i>        | 2.32E-10  | 0.38 | 0.26 | 0.14 | 7.75E-06  | CD8_1_Naive         |
| <i>Zfp36l2</i>       | 8.04E-10  | 0.44 | 0.53 | 0.41 | 2.69E-05  | CD8_1_Naive         |
| <i>Thap3</i>         | 9.25E-10  | 0.37 | 0.28 | 0.16 | 3.09E-05  | CD8_1_Naive         |
| <i>Ypel3</i>         | 9.66E-10  | 0.27 | 0.64 | 0.53 | 3.23E-05  | CD8_1_Naive         |
| <i>Cd28</i>          | 2.36E-09  | 0.40 | 0.60 | 0.50 | 7.91E-05  | CD8_1_Naive         |
| <i>Klf6</i>          | 2.65E-09  | 0.38 | 0.63 | 0.53 | 8.88E-05  | CD8_1_Naive         |
| <i>Klk8</i>          | 3.41E-09  | 0.39 | 0.32 | 0.20 | 1.14E-04  | CD8_1_Naive         |
| <i>Txk</i>           | 3.74E-09  | 0.42 | 0.40 | 0.27 | 1.25E-04  | CD8_1_Naive         |
| <i>Socs3</i>         | 7.80E-09  | 0.45 | 0.36 | 0.25 | 2.61E-04  | CD8_1_Naive         |
| <i>Ccnd3</i>         | 8.07E-09  | 0.39 | 0.55 | 0.48 | 2.70E-04  | CD8_1_Naive         |
| <i>Hmha1</i>         | 2.64E-08  | 0.40 | 0.53 | 0.43 | 8.82E-04  | CD8_1_Naive         |
| <i>Hspa1a</i>        | 3.43E-08  | 0.37 | 0.44 | 0.33 | 1.15E-03  | CD8_1_Naive         |
| <i>Sgk1</i>          | 5.31E-08  | 0.43 | 0.28 | 0.18 | 1.78E-03  | CD8_1_Naive         |
| <i>Gm9844</i>        | 1.00E-07  | 0.46 | 0.29 | 0.19 | 3.35E-03  | CD8_1_Naive         |
| <i>Emb</i>           | 1.02E-07  | 0.40 | 0.35 | 0.25 | 3.40E-03  | CD8_1_Naive         |
| <i>Irf1</i>          | 1.11E-07  | 0.32 | 0.40 | 0.29 | 3.73E-03  | CD8_1_Naive         |
| <i>Btg2</i>          | 1.41E-07  | 0.29 | 0.59 | 0.51 | 4.72E-03  | CD8_1_Naive         |
| <i>Cox7a2l</i>       | 1.71E-07  | 0.28 | 0.72 | 0.71 | 5.73E-03  | CD8_1_Naive         |
| <i>Fos</i>           | 1.86E-07  | 0.46 | 0.58 | 0.52 | 6.21E-03  | CD8_1_Naive         |
| <i>Ctsw</i>          | 2.38E-07  | 0.34 | 0.63 | 0.58 | 7.95E-03  | CD8_1_Naive         |
| <i>Ifngr1</i>        | 4.13E-07  | 0.34 | 0.57 | 0.48 | 1.38E-02  | CD8_1_Naive         |
| <i>Wdr89</i>         | 4.21E-07  | 0.28 | 0.78 | 0.77 | 1.41E-02  | CD8_1_Naive         |
| <i>Ppp1r15a</i>      | 5.30E-07  | 0.40 | 0.49 | 0.41 | 1.77E-02  | CD8_1_Naive         |
| <i>Arhgap15</i>      | 1.01E-06  | 0.38 | 0.42 | 0.34 | 3.37E-02  | CD8_1_Naive         |
| <i>Eif4a2</i>        | 1.24E-06  | 0.30 | 0.61 | 0.57 | 4.14E-02  | CD8_1_Naive         |
| <i>2810417H13Rik</i> | 6.74E-196 | 2.01 | 0.88 | 0.16 | 2.25E-191 | CD8_2_Proliferating |
| <i>Birc5</i>         | 2.47E-175 | 1.54 | 0.75 | 0.09 | 8.27E-171 | CD8_2_Proliferating |
| <i>Stmn1</i>         | 7.49E-172 | 1.74 | 0.86 | 0.18 | 2.50E-167 | CD8_2_Proliferating |
| <i>Rrm2</i>          | 1.97E-159 | 1.68 | 0.68 | 0.08 | 6.59E-155 | CD8_2_Proliferating |
| <i>H2afz</i>         | 1.00E-155 | 1.27 | 0.99 | 0.84 | 3.36E-151 | CD8_2_Proliferating |
| <i>Cks1b</i>         | 2.58E-148 | 1.27 | 0.74 | 0.12 | 8.62E-144 | CD8_2_Proliferating |
| <i>Nusap1</i>        | 1.92E-147 | 1.22 | 0.56 | 0.04 | 6.43E-143 | CD8_2_Proliferating |
| <i>Ptma</i>          | 2.60E-146 | 1.04 | 1.00 | 0.95 | 8.69E-142 | CD8_2_Proliferating |
| <i>Hmgb2</i>         | 3.72E-138 | 1.42 | 0.97 | 0.75 | 1.25E-133 | CD8_2_Proliferating |
| <i>Spc24</i>         | 1.60E-137 | 0.91 | 0.57 | 0.05 | 5.35E-133 | CD8_2_Proliferating |
| <i>Asf1b</i>         | 2.56E-133 | 1.03 | 0.62 | 0.07 | 8.58E-129 | CD8_2_Proliferating |
| <i>Ccna2</i>         | 7.41E-133 | 1.06 | 0.53 | 0.04 | 2.48E-128 | CD8_2_Proliferating |
| <i>Hist1h2ap</i>     | 9.58E-126 | 1.87 | 0.63 | 0.10 | 3.20E-121 | CD8_2_Proliferating |
| <i>Tuba1b</i>        | 1.38E-121 | 1.60 | 0.85 | 0.33 | 4.62E-117 | CD8_2_Proliferating |
| <i>Cdca8</i>         | 1.98E-115 | 0.88 | 0.53 | 0.06 | 6.64E-111 | CD8_2_Proliferating |
| <i>Top2a</i>         | 2.09E-114 | 1.09 | 0.66 | 0.12 | 6.99E-110 | CD8_2_Proliferating |
| <i>Smc2</i>          | 2.56E-107 | 1.01 | 0.65 | 0.12 | 8.57E-103 | CD8_2_Proliferating |
| <i>Spc25</i>         | 1.22E-104 | 0.82 | 0.44 | 0.04 | 4.08E-100 | CD8_2_Proliferating |
| <i>Ccnb2</i>         | 5.93E-104 | 1.01 | 0.50 | 0.06 | 1.98E-99  | CD8_2_Proliferating |
| <i>Fbxo5</i>         | 4.21E-101 | 0.70 | 0.43 | 0.04 | 1.41E-96  | CD8_2_Proliferating |
| <i>Cdk1</i>          | 1.22E-99  | 0.83 | 0.47 | 0.05 | 4.08E-95  | CD8_2_Proliferating |
| <i>Ppia</i>          | 1.55E-95  | 0.61 | 1.00 | 0.97 | 5.19E-91  | CD8_2_Proliferating |

|                      |          |      |      |      |          |                     |
|----------------------|----------|------|------|------|----------|---------------------|
| <i>Hmgn2</i>         | 3.72E-95 | 1.20 | 0.88 | 0.44 | 1.24E-90 | CD8_2_Proliferating |
| <i>Gmnn</i>          | 2.76E-94 | 0.88 | 0.52 | 0.08 | 9.23E-90 | CD8_2_Proliferating |
| <i>Tacc3</i>         | 2.41E-92 | 0.64 | 0.40 | 0.03 | 8.06E-88 | CD8_2_Proliferating |
| <i>Ran</i>           | 1.23E-91 | 0.91 | 0.95 | 0.66 | 4.13E-87 | CD8_2_Proliferating |
| <i>Ube2c</i>         | 2.26E-91 | 1.42 | 0.53 | 0.09 | 7.57E-87 | CD8_2_Proliferating |
| <i>Pttg1</i>         | 1.26E-89 | 1.09 | 0.65 | 0.16 | 4.22E-85 | CD8_2_Proliferating |
| <i>Tubb5</i>         | 1.42E-89 | 1.28 | 0.91 | 0.57 | 4.74E-85 | CD8_2_Proliferating |
| <i>Mad2l1</i>        | 1.14E-88 | 0.67 | 0.49 | 0.07 | 3.83E-84 | CD8_2_Proliferating |
| <i>Cks2</i>          | 2.01E-88 | 1.09 | 0.68 | 0.19 | 6.71E-84 | CD8_2_Proliferating |
| <i>Cenpa</i>         | 6.96E-87 | 1.15 | 0.69 | 0.20 | 2.33E-82 | CD8_2_Proliferating |
| <i>Hmgb1</i>         | 1.13E-86 | 0.88 | 0.92 | 0.79 | 3.78E-82 | CD8_2_Proliferating |
| <i>Tk1</i>           | 1.51E-86 | 0.74 | 0.49 | 0.07 | 5.07E-82 | CD8_2_Proliferating |
| <i>Aurkb</i>         | 5.81E-86 | 0.60 | 0.34 | 0.02 | 1.94E-81 | CD8_2_Proliferating |
| <i>Rad51</i>         | 5.30E-84 | 0.53 | 0.37 | 0.03 | 1.77E-79 | CD8_2_Proliferating |
| <i>Cep55</i>         | 6.29E-83 | 0.60 | 0.36 | 0.03 | 2.10E-78 | CD8_2_Proliferating |
| <i>2700094K13Rik</i> | 2.11E-82 | 0.95 | 0.81 | 0.32 | 7.05E-78 | CD8_2_Proliferating |
| <i>Ccnb1</i>         | 2.59E-82 | 0.81 | 0.38 | 0.04 | 8.67E-78 | CD8_2_Proliferating |
| <i>Dut</i>           | 1.32E-81 | 0.95 | 0.78 | 0.28 | 4.43E-77 | CD8_2_Proliferating |
| <i>Cdca3</i>         | 1.04E-80 | 0.68 | 0.39 | 0.04 | 3.47E-76 | CD8_2_Proliferating |
| <i>Casc5</i>         | 3.39E-80 | 0.57 | 0.31 | 0.02 | 1.14E-75 | CD8_2_Proliferating |
| <i>Lig1</i>          | 3.68E-78 | 0.79 | 0.50 | 0.09 | 1.23E-73 | CD8_2_Proliferating |
| <i>Kpna2</i>         | 3.42E-74 | 0.94 | 0.48 | 0.09 | 1.14E-69 | CD8_2_Proliferating |
| <i>Sgol1</i>         | 5.04E-74 | 0.47 | 0.28 | 0.01 | 1.68E-69 | CD8_2_Proliferating |
| <i>Cdc20</i>         | 7.30E-74 | 0.87 | 0.39 | 0.05 | 2.44E-69 | CD8_2_Proliferating |
| <i>Tyms</i>          | 2.36E-73 | 0.75 | 0.51 | 0.11 | 7.89E-69 | CD8_2_Proliferating |
| <i>Tipin</i>         | 1.65E-72 | 0.89 | 0.67 | 0.20 | 5.51E-68 | CD8_2_Proliferating |
| <i>Mki67</i>         | 2.76E-72 | 0.57 | 0.34 | 0.03 | 9.22E-68 | CD8_2_Proliferating |
| <i>Cenpe</i>         | 6.05E-71 | 0.54 | 0.30 | 0.02 | 2.03E-66 | CD8_2_Proliferating |
| <i>Tmpo</i>          | 7.51E-70 | 0.79 | 0.63 | 0.18 | 2.51E-65 | CD8_2_Proliferating |
| <i>Tpx2</i>          | 8.08E-70 | 0.54 | 0.31 | 0.03 | 2.70E-65 | CD8_2_Proliferating |
| <i>Hmmr</i>          | 1.07E-69 | 0.54 | 0.28 | 0.02 | 3.59E-65 | CD8_2_Proliferating |
| <i>Cenpm</i>         | 7.50E-69 | 0.50 | 0.33 | 0.04 | 2.51E-64 | CD8_2_Proliferating |
| <i>Cenpf</i>         | 4.97E-68 | 0.59 | 0.30 | 0.03 | 1.66E-63 | CD8_2_Proliferating |
| <i>H2afx</i>         | 2.00E-66 | 1.00 | 0.56 | 0.16 | 6.68E-62 | CD8_2_Proliferating |
| <i>Smc4</i>          | 1.21E-65 | 0.79 | 0.69 | 0.24 | 4.04E-61 | CD8_2_Proliferating |
| <i>Anp32b</i>        | 1.28E-65 | 0.78 | 0.88 | 0.49 | 4.29E-61 | CD8_2_Proliferating |
| <i>Pbk</i>           | 1.73E-65 | 0.46 | 0.28 | 0.02 | 5.79E-61 | CD8_2_Proliferating |
| <i>Ybx1</i>          | 3.93E-63 | 0.68 | 0.94 | 0.77 | 1.31E-58 | CD8_2_Proliferating |
| <i>Shcbp1</i>        | 4.25E-62 | 0.43 | 0.25 | 0.02 | 1.42E-57 | CD8_2_Proliferating |
| <i>Rfc5</i>          | 4.38E-62 | 0.53 | 0.46 | 0.10 | 1.46E-57 | CD8_2_Proliferating |
| <i>Gm10282</i>       | 9.17E-60 | 0.53 | 0.40 | 0.07 | 3.07E-55 | CD8_2_Proliferating |
| <i>Mcm5</i>          | 1.15E-59 | 0.57 | 0.43 | 0.09 | 3.86E-55 | CD8_2_Proliferating |
| <i>Cenpw</i>         | 1.22E-59 | 0.58 | 0.49 | 0.12 | 4.07E-55 | CD8_2_Proliferating |
| <i>Ska1</i>          | 3.94E-59 | 0.41 | 0.27 | 0.03 | 1.32E-54 | CD8_2_Proliferating |
| <i>Ranbp1</i>        | 7.88E-59 | 0.86 | 0.85 | 0.50 | 2.64E-54 | CD8_2_Proliferating |
| <i>4930579G24Rik</i> | 2.08E-58 | 0.47 | 0.31 | 0.04 | 6.95E-54 | CD8_2_Proliferating |
| <i>Prc1</i>          | 5.73E-58 | 0.40 | 0.28 | 0.03 | 1.92E-53 | CD8_2_Proliferating |
| <i>Dek</i>           | 6.71E-58 | 0.81 | 0.78 | 0.36 | 2.24E-53 | CD8_2_Proliferating |

|                      |          |      |      |      |          |                     |
|----------------------|----------|------|------|------|----------|---------------------|
| <i>Hist1h1b</i>      | 3.80E-57 | 0.49 | 0.27 | 0.03 | 1.27E-52 | CD8_2_Proliferating |
| <i>Erh</i>           | 1.53E-56 | 0.69 | 0.92 | 0.62 | 5.12E-52 | CD8_2_Proliferating |
| <i>Kif22</i>         | 8.10E-56 | 0.45 | 0.27 | 0.03 | 2.71E-51 | CD8_2_Proliferating |
| <i>1190002F15Rik</i> | 2.91E-55 | 0.54 | 0.40 | 0.08 | 9.73E-51 | CD8_2_Proliferating |
| <i>Aurka</i>         | 2.77E-54 | 0.46 | 0.25 | 0.02 | 9.26E-50 | CD8_2_Proliferating |
| <i>Cdkn2c</i>        | 5.95E-54 | 0.48 | 0.38 | 0.07 | 1.99E-49 | CD8_2_Proliferating |
| <i>Nucks1</i>        | 1.25E-52 | 0.57 | 0.57 | 0.18 | 4.20E-48 | CD8_2_Proliferating |
| <i>Hmgb3</i>         | 1.97E-52 | 0.51 | 0.40 | 0.08 | 6.58E-48 | CD8_2_Proliferating |
| <i>Lsm5</i>          | 2.94E-51 | 0.67 | 0.83 | 0.48 | 9.84E-47 | CD8_2_Proliferating |
| <i>Lsm2</i>          | 2.12E-50 | 0.57 | 0.59 | 0.20 | 7.09E-46 | CD8_2_Proliferating |
| <i>Dbf4</i>          | 2.17E-50 | 0.41 | 0.34 | 0.06 | 7.27E-46 | CD8_2_Proliferating |
| <i>Mcm7</i>          | 4.11E-50 | 0.56 | 0.44 | 0.11 | 1.38E-45 | CD8_2_Proliferating |
| <i>Rfc4</i>          | 3.14E-49 | 0.45 | 0.37 | 0.08 | 1.05E-44 | CD8_2_Proliferating |
| <i>Ezh2</i>          | 2.70E-48 | 0.56 | 0.50 | 0.15 | 9.03E-44 | CD8_2_Proliferating |
| <i>Pmf1</i>          | 3.37E-48 | 0.51 | 0.40 | 0.09 | 1.13E-43 | CD8_2_Proliferating |
| <i>Pcna</i>          | 6.25E-48 | 0.72 | 0.64 | 0.26 | 2.09E-43 | CD8_2_Proliferating |
| <i>Lmnb1</i>         | 1.34E-47 | 0.54 | 0.58 | 0.20 | 4.49E-43 | CD8_2_Proliferating |
| <i>Fen1</i>          | 1.99E-47 | 0.47 | 0.38 | 0.08 | 6.67E-43 | CD8_2_Proliferating |
| <i>Banf1</i>         | 5.11E-47 | 0.56 | 0.65 | 0.24 | 1.71E-42 | CD8_2_Proliferating |
| <i>Aptd1</i>         | 1.18E-46 | 0.44 | 0.29 | 0.05 | 3.94E-42 | CD8_2_Proliferating |
| <i>Hells</i>         | 2.87E-46 | 0.50 | 0.37 | 0.08 | 9.60E-42 | CD8_2_Proliferating |
| <i>Hnrnpab</i>       | 3.72E-46 | 0.63 | 0.72 | 0.32 | 1.25E-41 | CD8_2_Proliferating |
| <i>Knstrn</i>        | 7.03E-46 | 0.46 | 0.31 | 0.06 | 2.35E-41 | CD8_2_Proliferating |
| <i>Pcna-ps2</i>      | 3.67E-45 | 0.51 | 0.39 | 0.09 | 1.23E-40 | CD8_2_Proliferating |
| <i>Anapc5</i>        | 4.54E-45 | 0.52 | 0.62 | 0.22 | 1.52E-40 | CD8_2_Proliferating |
| <i>Ccdc34</i>        | 1.25E-44 | 0.46 | 0.32 | 0.06 | 4.17E-40 | CD8_2_Proliferating |
| <i>Racgap1</i>       | 1.33E-44 | 0.49 | 0.36 | 0.08 | 4.46E-40 | CD8_2_Proliferating |
| <i>Prdx1</i>         | 2.05E-44 | 0.52 | 0.96 | 0.83 | 6.85E-40 | CD8_2_Proliferating |
| <i>Dhfr</i>          | 3.48E-44 | 0.35 | 0.25 | 0.04 | 1.17E-39 | CD8_2_Proliferating |
| <i>Slbp</i>          | 5.39E-44 | 0.78 | 0.73 | 0.39 | 1.80E-39 | CD8_2_Proliferating |
| <i>Plk4</i>          | 7.31E-44 | 0.34 | 0.28 | 0.04 | 2.45E-39 | CD8_2_Proliferating |
| <i>H2afv</i>         | 1.91E-43 | 0.71 | 0.78 | 0.43 | 6.39E-39 | CD8_2_Proliferating |
| <i>Cmc2</i>          | 3.14E-43 | 0.52 | 0.52 | 0.17 | 1.05E-38 | CD8_2_Proliferating |
| <i>Srsf3</i>         | 4.62E-43 | 0.57 | 0.92 | 0.65 | 1.55E-38 | CD8_2_Proliferating |
| <i>Rps27l</i>        | 1.66E-42 | 0.69 | 0.85 | 0.51 | 5.55E-38 | CD8_2_Proliferating |
| <i>Rad21</i>         | 2.44E-42 | 0.46 | 0.46 | 0.13 | 8.16E-38 | CD8_2_Proliferating |
| <i>Dctpp1</i>        | 1.76E-41 | 0.52 | 0.50 | 0.16 | 5.89E-37 | CD8_2_Proliferating |
| <i>Tex30</i>         | 3.56E-41 | 0.42 | 0.39 | 0.10 | 1.19E-36 | CD8_2_Proliferating |
| <i>Nap111</i>        | 5.79E-41 | 0.64 | 0.77 | 0.41 | 1.94E-36 | CD8_2_Proliferating |
| <i>Snrpd1</i>        | 1.59E-40 | 0.57 | 0.71 | 0.34 | 5.33E-36 | CD8_2_Proliferating |
| <i>Rpa3</i>          | 4.44E-40 | 0.61 | 0.64 | 0.28 | 1.48E-35 | CD8_2_Proliferating |
| <i>Lsm3</i>          | 4.93E-40 | 0.57 | 0.68 | 0.29 | 1.65E-35 | CD8_2_Proliferating |
| <i>Tcf19</i>         | 1.15E-39 | 0.36 | 0.26 | 0.04 | 3.84E-35 | CD8_2_Proliferating |
| <i>Fxn</i>           | 1.93E-39 | 0.38 | 0.34 | 0.08 | 6.45E-35 | CD8_2_Proliferating |
| <i>Rpp30</i>         | 2.08E-39 | 0.34 | 0.37 | 0.09 | 6.98E-35 | CD8_2_Proliferating |
| <i>Ube2s</i>         | 3.24E-39 | 0.73 | 0.67 | 0.30 | 1.09E-34 | CD8_2_Proliferating |
| <i>Prim1</i>         | 4.85E-39 | 0.38 | 0.27 | 0.05 | 1.62E-34 | CD8_2_Proliferating |
| <i>Hnrnpa3</i>       | 6.60E-39 | 0.54 | 0.86 | 0.64 | 2.21E-34 | CD8_2_Proliferating |

|                      |          |      |      |      |          |                     |
|----------------------|----------|------|------|------|----------|---------------------|
| <i>Nup37</i>         | 9.08E-39 | 0.37 | 0.31 | 0.06 | 3.04E-34 | CD8_2_Proliferating |
| <i>Anp32e</i>        | 9.47E-38 | 0.53 | 0.57 | 0.23 | 3.17E-33 | CD8_2_Proliferating |
| <i>Rbbp7</i>         | 1.28E-37 | 0.54 | 0.69 | 0.32 | 4.30E-33 | CD8_2_Proliferating |
| <i>Phgdh</i>         | 1.44E-37 | 0.41 | 0.44 | 0.14 | 4.82E-33 | CD8_2_Proliferating |
| <i>Fkbp2</i>         | 1.70E-37 | 0.44 | 0.53 | 0.19 | 5.70E-33 | CD8_2_Proliferating |
| <i>Lsm6</i>          | 8.14E-37 | 0.60 | 0.75 | 0.40 | 2.72E-32 | CD8_2_Proliferating |
| <i>Mis18a</i>        | 9.34E-37 | 0.44 | 0.47 | 0.16 | 3.12E-32 | CD8_2_Proliferating |
| <i>Hat1</i>          | 2.46E-36 | 0.42 | 0.41 | 0.12 | 8.24E-32 | CD8_2_Proliferating |
| <i>Ly6e</i>          | 3.49E-36 | 0.62 | 0.83 | 0.53 | 1.17E-31 | CD8_2_Proliferating |
| <i>Tuba1c</i>        | 5.79E-36 | 0.62 | 0.37 | 0.10 | 1.94E-31 | CD8_2_Proliferating |
| <i>Sumo2</i>         | 9.61E-36 | 0.39 | 0.95 | 0.88 | 3.22E-31 | CD8_2_Proliferating |
| <i>Tubb4b</i>        | 1.14E-35 | 0.63 | 0.50 | 0.19 | 3.82E-31 | CD8_2_Proliferating |
| <i>Gins2</i>         | 1.23E-35 | 0.35 | 0.25 | 0.05 | 4.11E-31 | CD8_2_Proliferating |
| <i>Bub3</i>          | 1.56E-35 | 0.56 | 0.67 | 0.32 | 5.22E-31 | CD8_2_Proliferating |
| <i>Nasp</i>          | 2.54E-35 | 0.45 | 0.43 | 0.14 | 8.49E-31 | CD8_2_Proliferating |
| <i>Cbx3</i>          | 3.02E-35 | 0.58 | 0.77 | 0.46 | 1.01E-30 | CD8_2_Proliferating |
| <i>Siva1</i>         | 3.96E-35 | 0.48 | 0.49 | 0.17 | 1.33E-30 | CD8_2_Proliferating |
| <i>Nudt21</i>        | 3.96E-34 | 0.51 | 0.77 | 0.44 | 1.33E-29 | CD8_2_Proliferating |
| <i>Pfn1</i>          | 1.24E-33 | 0.28 | 1.00 | 1.00 | 4.14E-29 | CD8_2_Proliferating |
| <i>Nudcd2</i>        | 1.25E-33 | 0.45 | 0.50 | 0.18 | 4.19E-29 | CD8_2_Proliferating |
| <i>Ddx39</i>         | 2.22E-33 | 0.47 | 0.59 | 0.25 | 7.41E-29 | CD8_2_Proliferating |
| <i>Srsf2</i>         | 3.64E-33 | 0.52 | 0.79 | 0.49 | 1.22E-28 | CD8_2_Proliferating |
| <i>Nudt5</i>         | 4.59E-33 | 0.46 | 0.51 | 0.19 | 1.54E-28 | CD8_2_Proliferating |
| <i>Srsf7</i>         | 1.40E-32 | 0.51 | 0.79 | 0.46 | 4.68E-28 | CD8_2_Proliferating |
| <i>Usp1</i>          | 2.30E-32 | 0.36 | 0.43 | 0.14 | 7.71E-28 | CD8_2_Proliferating |
| <i>Alyref</i>        | 2.31E-32 | 0.51 | 0.55 | 0.22 | 7.72E-28 | CD8_2_Proliferating |
| <i>Rfc3</i>          | 2.51E-32 | 0.33 | 0.31 | 0.08 | 8.40E-28 | CD8_2_Proliferating |
| <i>Rbm3</i>          | 2.76E-32 | 0.43 | 0.92 | 0.82 | 9.23E-28 | CD8_2_Proliferating |
| <i>Orc6</i>          | 5.04E-32 | 0.37 | 0.32 | 0.09 | 1.69E-27 | CD8_2_Proliferating |
| <i>Smc6</i>          | 9.57E-32 | 0.49 | 0.66 | 0.31 | 3.20E-27 | CD8_2_Proliferating |
| <i>2700029M09Rik</i> | 9.97E-32 | 0.48 | 0.55 | 0.22 | 3.34E-27 | CD8_2_Proliferating |
| <i>Eri1</i>          | 2.75E-31 | 0.29 | 0.43 | 0.14 | 9.19E-27 | CD8_2_Proliferating |
| <i>Mrpl42</i>        | 3.80E-31 | 0.49 | 0.66 | 0.31 | 1.27E-26 | CD8_2_Proliferating |
| <i>Cox5a</i>         | 4.31E-31 | 0.46 | 0.90 | 0.70 | 1.44E-26 | CD8_2_Proliferating |
| <i>Slc25a5</i>       | 6.39E-31 | 0.44 | 0.90 | 0.72 | 2.14E-26 | CD8_2_Proliferating |
| <i>Hdgf</i>          | 9.51E-31 | 0.45 | 0.58 | 0.25 | 3.18E-26 | CD8_2_Proliferating |
| <i>Ppih</i>          | 9.56E-31 | 0.36 | 0.35 | 0.11 | 3.20E-26 | CD8_2_Proliferating |
| <i>Lgals1</i>        | 1.76E-30 | 0.45 | 0.98 | 0.86 | 5.90E-26 | CD8_2_Proliferating |
| <i>Lyar</i>          | 1.91E-30 | 0.49 | 0.50 | 0.19 | 6.40E-26 | CD8_2_Proliferating |
| <i>Ndufa4</i>        | 3.33E-30 | 0.44 | 0.91 | 0.68 | 1.11E-25 | CD8_2_Proliferating |
| <i>Ywhah</i>         | 3.48E-30 | 0.47 | 0.88 | 0.65 | 1.16E-25 | CD8_2_Proliferating |
| <i>Txn1</i>          | 8.25E-30 | 0.47 | 0.85 | 0.58 | 2.76E-25 | CD8_2_Proliferating |
| <i>Pdia6</i>         | 1.34E-29 | 0.50 | 0.65 | 0.32 | 4.49E-25 | CD8_2_Proliferating |
| <i>Smc3</i>          | 1.37E-29 | 0.34 | 0.45 | 0.16 | 4.59E-25 | CD8_2_Proliferating |
| <i>Impdh2</i>        | 1.77E-29 | 0.42 | 0.47 | 0.18 | 5.91E-25 | CD8_2_Proliferating |
| <i>Cdk2</i>          | 2.41E-29 | 0.32 | 0.27 | 0.07 | 8.06E-25 | CD8_2_Proliferating |
| <i>Rnaseh2c</i>      | 2.42E-29 | 0.46 | 0.54 | 0.23 | 8.09E-25 | CD8_2_Proliferating |
| <i>Dnajc9</i>        | 2.64E-29 | 0.48 | 0.77 | 0.44 | 8.82E-25 | CD8_2_Proliferating |

|                      |          |      |      |      |          |                     |
|----------------------|----------|------|------|------|----------|---------------------|
| <i>Pfdn6</i>         | 2.84E-29 | 0.42 | 0.52 | 0.21 | 9.51E-25 | CD8_2_Proliferating |
| <i>Nutf2</i>         | 2.90E-29 | 0.40 | 0.56 | 0.25 | 9.70E-25 | CD8_2_Proliferating |
| <i>Nme1</i>          | 5.05E-29 | 0.50 | 0.83 | 0.53 | 1.69E-24 | CD8_2_Proliferating |
| <i>Tubg1</i>         | 5.29E-29 | 0.34 | 0.33 | 0.10 | 1.77E-24 | CD8_2_Proliferating |
| <i>Mcm3</i>          | 1.29E-28 | 0.28 | 0.31 | 0.09 | 4.32E-24 | CD8_2_Proliferating |
| <i>Dnmt1</i>         | 1.83E-28 | 0.31 | 0.30 | 0.08 | 6.13E-24 | CD8_2_Proliferating |
| <i>Dpy30</i>         | 1.84E-28 | 0.44 | 0.65 | 0.31 | 6.17E-24 | CD8_2_Proliferating |
| <i>Nrm</i>           | 1.97E-28 | 0.30 | 0.27 | 0.07 | 6.61E-24 | CD8_2_Proliferating |
| <i>Psat1</i>         | 2.31E-28 | 0.32 | 0.30 | 0.09 | 7.72E-24 | CD8_2_Proliferating |
| <i>Tpi1</i>          | 2.98E-28 | 0.47 | 0.44 | 0.17 | 9.96E-24 | CD8_2_Proliferating |
| <i>Eif5a</i>         | 4.38E-28 | 0.45 | 0.92 | 0.77 | 1.47E-23 | CD8_2_Proliferating |
| <i>Gapdh</i>         | 5.30E-28 | 0.44 | 0.90 | 0.72 | 1.77E-23 | CD8_2_Proliferating |
| <i>Fzr1</i>          | 6.02E-28 | 0.29 | 0.32 | 0.10 | 2.01E-23 | CD8_2_Proliferating |
| <i>Cisd1</i>         | 7.22E-28 | 0.44 | 0.48 | 0.20 | 2.42E-23 | CD8_2_Proliferating |
| <i>Hmgn1</i>         | 7.36E-28 | 0.47 | 0.67 | 0.34 | 2.46E-23 | CD8_2_Proliferating |
| <i>Nhp2l1</i>        | 1.28E-27 | 0.47 | 0.81 | 0.49 | 4.30E-23 | CD8_2_Proliferating |
| <i>Snrpe</i>         | 1.57E-27 | 0.44 | 0.85 | 0.64 | 5.26E-23 | CD8_2_Proliferating |
| <i>Hsp90b1</i>       | 1.97E-27 | 0.49 | 0.75 | 0.43 | 6.58E-23 | CD8_2_Proliferating |
| <i>Pold2</i>         | 2.04E-27 | 0.35 | 0.32 | 0.10 | 6.84E-23 | CD8_2_Proliferating |
| <i>Hnrnpa2b1</i>     | 2.54E-27 | 0.46 | 0.83 | 0.58 | 8.48E-23 | CD8_2_Proliferating |
| <i>Rfc2</i>          | 3.35E-27 | 0.41 | 0.52 | 0.22 | 1.12E-22 | CD8_2_Proliferating |
| <i>Snrpf</i>         | 3.91E-27 | 0.44 | 0.83 | 0.53 | 1.31E-22 | CD8_2_Proliferating |
| <i>Anapc15</i>       | 4.27E-27 | 0.31 | 0.33 | 0.10 | 1.43E-22 | CD8_2_Proliferating |
| <i>Dbi</i>           | 7.08E-27 | 0.49 | 0.70 | 0.38 | 2.37E-22 | CD8_2_Proliferating |
| <i>Snrpa1</i>        | 7.56E-27 | 0.44 | 0.58 | 0.27 | 2.53E-22 | CD8_2_Proliferating |
| <i>Calm1</i>         | 8.03E-27 | 0.34 | 0.98 | 0.88 | 2.69E-22 | CD8_2_Proliferating |
| <i>Exosc8</i>        | 1.04E-26 | 0.41 | 0.58 | 0.26 | 3.47E-22 | CD8_2_Proliferating |
| <i>Reep4</i>         | 1.36E-26 | 0.36 | 0.30 | 0.09 | 4.56E-22 | CD8_2_Proliferating |
| <i>Cdk4</i>          | 2.00E-26 | 0.45 | 0.59 | 0.27 | 6.69E-22 | CD8_2_Proliferating |
| <i>Uchl5</i>         | 2.38E-26 | 0.31 | 0.45 | 0.17 | 7.98E-22 | CD8_2_Proliferating |
| <i>Tcp1</i>          | 2.68E-26 | 0.43 | 0.60 | 0.28 | 8.98E-22 | CD8_2_Proliferating |
| <i>D030056L22Rik</i> | 2.94E-26 | 0.29 | 0.35 | 0.11 | 9.83E-22 | CD8_2_Proliferating |
| <i>Sumo3</i>         | 3.04E-26 | 0.43 | 0.58 | 0.27 | 1.02E-21 | CD8_2_Proliferating |
| <i>Sae1</i>          | 3.61E-26 | 0.30 | 0.46 | 0.18 | 1.21E-21 | CD8_2_Proliferating |
| <i>Ly6a</i>          | 4.49E-41 | 0.74 | 0.92 | 0.76 | 1.50E-36 | CD8_3_Cytotoxic     |
| <i>Cd52</i>          | 4.03E-33 | 0.39 | 0.99 | 0.97 | 1.35E-28 | CD8_3_Cytotoxic     |
| <b>Gzma</b>          | 1.01E-30 | 1.29 | 0.55 | 0.28 | 3.39E-26 | CD8_3_Cytotoxic     |
| <i>Ms4a4b</i>        | 1.37E-30 | 0.50 | 0.96 | 0.90 | 4.58E-26 | CD8_3_Cytotoxic     |
| <i>Tmsb10</i>        | 5.00E-29 | 0.44 | 0.99 | 0.96 | 1.67E-24 | CD8_3_Cytotoxic     |
| <i>Ccl5</i>          | 8.59E-28 | 0.51 | 0.99 | 0.97 | 2.87E-23 | CD8_3_Cytotoxic     |
| <i>Hopx</i>          | 6.79E-27 | 0.82 | 0.55 | 0.30 | 2.27E-22 | CD8_3_Cytotoxic     |
| <b>Gzmk</b>          | 1.12E-19 | 0.60 | 0.61 | 0.41 | 3.74E-15 | CD8_3_Cytotoxic     |
| <i>Ctla2a</i>        | 6.54E-19 | 0.63 | 0.65 | 0.46 | 2.19E-14 | CD8_3_Cytotoxic     |
| <b>Klrk1</b>         | 7.75E-15 | 0.60 | 0.48 | 0.31 | 2.59E-10 | CD8_3_Cytotoxic     |
| <i>Epsti1</i>        | 2.62E-14 | 0.59 | 0.49 | 0.33 | 8.75E-10 | CD8_3_Cytotoxic     |
| <i>Ccr2</i>          | 2.98E-14 | 0.48 | 0.40 | 0.22 | 9.98E-10 | CD8_3_Cytotoxic     |
| <i>Ms4a6b</i>        | 3.56E-14 | 0.37 | 0.85 | 0.76 | 1.19E-09 | CD8_3_Cytotoxic     |

|                 |          |      |      |      |          |                 |
|-----------------|----------|------|------|------|----------|-----------------|
| <i>S100a10</i>  | 5.54E-13 | 0.34 | 0.85 | 0.81 | 1.85E-08 | CD8_3_Cytotoxic |
| <i>Sp110</i>    | 1.78E-12 | 0.47 | 0.43 | 0.27 | 5.96E-08 | CD8_3_Cytotoxic |
| <i>Plac8</i>    | 7.05E-12 | 0.80 | 0.49 | 0.36 | 2.36E-07 | CD8_3_Cytotoxic |
| <i>Dnajc15</i>  | 3.45E-11 | 0.42 | 0.50 | 0.35 | 1.15E-06 | CD8_3_Cytotoxic |
| <i>Crip1</i>    | 6.43E-11 | 0.27 | 0.94 | 0.92 | 2.15E-06 | CD8_3_Cytotoxic |
| <i>Klf2</i>     | 1.59E-10 | 0.39 | 0.64 | 0.48 | 5.33E-06 | CD8_3_Cytotoxic |
| <i>Cd47</i>     | 4.81E-10 | 0.37 | 0.68 | 0.59 | 1.61E-05 | CD8_3_Cytotoxic |
| <i>Hcst</i>     | 1.81E-09 | 0.39 | 0.71 | 0.62 | 6.07E-05 | CD8_3_Cytotoxic |
| <i>St3gal6</i>  | 5.19E-09 | 0.36 | 0.28 | 0.15 | 1.74E-04 | CD8_3_Cytotoxic |
| <b>Gzmb</b>     | 1.33E-08 | 0.39 | 0.51 | 0.37 | 4.43E-04 | CD8_3_Cytotoxic |
| <i>Lgals3</i>   | 1.39E-08 | 0.43 | 0.61 | 0.51 | 4.65E-04 | CD8_3_Cytotoxic |
| <i>Hsd11b1</i>  | 3.20E-08 | 0.39 | 0.25 | 0.14 | 1.07E-03 | CD8_3_Cytotoxic |
| <i>Arl6ip5</i>  | 3.73E-08 | 0.28 | 0.72 | 0.65 | 1.25E-03 | CD8_3_Cytotoxic |
| <i>Lsp1</i>     | 6.63E-08 | 0.30 | 0.70 | 0.69 | 2.22E-03 | CD8_3_Cytotoxic |
| <b>Klrc1</b>    | 1.72E-07 | 0.37 | 0.62 | 0.50 | 5.76E-03 | CD8_3_Cytotoxic |
| <i>Selplg</i>   | 2.32E-07 | 0.33 | 0.70 | 0.66 | 7.78E-03 | CD8_3_Cytotoxic |
| <i>Vasp</i>     | 3.90E-07 | 0.28 | 0.73 | 0.69 | 1.31E-02 | CD8_3_Cytotoxic |
| <i>F2r</i>      | 4.12E-07 | 0.43 | 0.45 | 0.35 | 1.38E-02 | CD8_3_Cytotoxic |
| <i>Glipr2</i>   | 7.03E-07 | 0.38 | 0.41 | 0.31 | 2.35E-02 | CD8_3_Cytotoxic |
| <i>Pycard</i>   | 1.07E-06 | 0.37 | 0.59 | 0.56 | 3.58E-02 | CD8_3_Cytotoxic |
| <i>Utf1</i>     | 1.11E-37 | 0.59 | 0.30 | 0.03 | 3.71E-33 | CD8_4_Xcl1+     |
| <i>Eif5a</i>    | 1.57E-23 | 0.86 | 0.97 | 0.79 | 5.26E-19 | CD8_4_Xcl1+     |
| <i>Npm1</i>     | 8.77E-21 | 0.74 | 0.98 | 0.80 | 2.94E-16 | CD8_4_Xcl1+     |
| <i>Nhp2</i>     | 2.39E-19 | 0.83 | 0.78 | 0.39 | 8.00E-15 | CD8_4_Xcl1+     |
| <i>Tnfrsf9</i>  | 5.06E-19 | 0.98 | 0.61 | 0.23 | 1.69E-14 | CD8_4_Xcl1+     |
| <b>Xcl1</b>     | 2.31E-18 | 1.79 | 0.68 | 0.34 | 7.74E-14 | CD8_4_Xcl1+     |
| <i>Mif</i>      | 2.11E-17 | 0.80 | 0.86 | 0.65 | 7.05E-13 | CD8_4_Xcl1+     |
| <i>C1qbp</i>    | 3.91E-17 | 0.67 | 0.66 | 0.28 | 1.31E-12 | CD8_4_Xcl1+     |
| <i>Nop16</i>    | 4.33E-17 | 0.58 | 0.36 | 0.09 | 1.45E-12 | CD8_4_Xcl1+     |
| <i>Srm</i>      | 4.43E-17 | 0.68 | 0.40 | 0.11 | 1.48E-12 | CD8_4_Xcl1+     |
| <i>Ebna1bp2</i> | 7.93E-17 | 0.77 | 0.62 | 0.26 | 2.65E-12 | CD8_4_Xcl1+     |
| <i>Nolc1</i>    | 1.01E-16 | 0.61 | 0.41 | 0.12 | 3.38E-12 | CD8_4_Xcl1+     |
| <i>Fbl</i>      | 1.60E-16 | 0.76 | 0.62 | 0.27 | 5.37E-12 | CD8_4_Xcl1+     |
| <i>Tomm40</i>   | 7.57E-16 | 0.71 | 0.48 | 0.17 | 2.53E-11 | CD8_4_Xcl1+     |
| <i>Grwd1</i>    | 2.25E-15 | 0.59 | 0.26 | 0.05 | 7.54E-11 | CD8_4_Xcl1+     |
| <i>Rcl1</i>     | 6.30E-15 | 0.44 | 0.31 | 0.07 | 2.11E-10 | CD8_4_Xcl1+     |
| <i>Eif4a1</i>   | 1.09E-14 | 0.56 | 0.94 | 0.75 | 3.63E-10 | CD8_4_Xcl1+     |
| <i>Ncl</i>      | 2.24E-14 | 0.69 | 0.78 | 0.48 | 7.48E-10 | CD8_4_Xcl1+     |
| <i>Phb</i>      | 3.81E-14 | 0.71 | 0.54 | 0.22 | 1.28E-09 | CD8_4_Xcl1+     |
| <i>Ranbp1</i>   | 6.41E-14 | 0.64 | 0.87 | 0.56 | 2.14E-09 | CD8_4_Xcl1+     |
| <i>Tomm20</i>   | 1.40E-13 | 0.62 | 0.87 | 0.61 | 4.67E-09 | CD8_4_Xcl1+     |
| <i>Naa50</i>    | 2.73E-13 | 0.64 | 0.60 | 0.26 | 9.14E-09 | CD8_4_Xcl1+     |
| <i>Nme1</i>     | 2.75E-13 | 0.65 | 0.82 | 0.57 | 9.21E-09 | CD8_4_Xcl1+     |
| <i>Gar1</i>     | 6.35E-13 | 0.58 | 0.53 | 0.22 | 2.12E-08 | CD8_4_Xcl1+     |
| <i>Rgs16</i>    | 9.24E-13 | 0.71 | 0.84 | 0.52 | 3.09E-08 | CD8_4_Xcl1+     |
| <i>Cd200</i>    | 1.23E-12 | 0.84 | 0.67 | 0.38 | 4.11E-08 | CD8_4_Xcl1+     |
| <i>Nsun2</i>    | 1.34E-12 | 0.49 | 0.40 | 0.14 | 4.48E-08 | CD8_4_Xcl1+     |

|                   |          |      |      |      |          |             |
|-------------------|----------|------|------|------|----------|-------------|
| <i>Mrps18b</i>    | 3.07E-12 | 0.48 | 0.31 | 0.09 | 1.03E-07 | CD8_4_Xcl1+ |
| <i>Dkc1</i>       | 5.24E-12 | 0.58 | 0.36 | 0.12 | 1.75E-07 | CD8_4_Xcl1+ |
| <i>Cyca</i>       | 8.67E-12 | 0.60 | 0.86 | 0.54 | 2.90E-07 | CD8_4_Xcl1+ |
| <i>Apex1</i>      | 1.86E-11 | 0.47 | 0.36 | 0.12 | 6.22E-07 | CD8_4_Xcl1+ |
| <i>Emc6</i>       | 2.17E-11 | 0.55 | 0.63 | 0.32 | 7.25E-07 | CD8_4_Xcl1+ |
| <i>Wdr43</i>      | 2.35E-11 | 0.60 | 0.48 | 0.20 | 7.87E-07 | CD8_4_Xcl1+ |
| <i>Lsm7</i>       | 3.45E-11 | 0.56 | 0.52 | 0.22 | 1.16E-06 | CD8_4_Xcl1+ |
| <i>Rrs1</i>       | 4.70E-11 | 0.61 | 0.41 | 0.16 | 1.57E-06 | CD8_4_Xcl1+ |
| <i>Eef1e1</i>     | 5.15E-11 | 0.67 | 0.53 | 0.25 | 1.72E-06 | CD8_4_Xcl1+ |
| <i>Nop58</i>      | 6.21E-11 | 0.60 | 0.51 | 0.22 | 2.08E-06 | CD8_4_Xcl1+ |
| <i>Ptma</i>       | 7.19E-11 | 0.34 | 1.00 | 0.95 | 2.41E-06 | CD8_4_Xcl1+ |
| <i>St6galnac4</i> | 7.44E-11 | 0.54 | 0.38 | 0.14 | 2.49E-06 | CD8_4_Xcl1+ |
| <i>Pno1</i>       | 7.46E-11 | 0.49 | 0.37 | 0.13 | 2.50E-06 | CD8_4_Xcl1+ |
| <i>Gtpbp4</i>     | 1.04E-10 | 0.51 | 0.48 | 0.20 | 3.49E-06 | CD8_4_Xcl1+ |
| <i>Gm11974</i>    | 1.15E-10 | 0.61 | 0.38 | 0.14 | 3.85E-06 | CD8_4_Xcl1+ |
| <i>Nek6</i>       | 1.34E-10 | 0.48 | 0.25 | 0.07 | 4.48E-06 | CD8_4_Xcl1+ |
| <i>Hspd1</i>      | 1.99E-10 | 0.57 | 0.68 | 0.39 | 6.67E-06 | CD8_4_Xcl1+ |
| <i>Set</i>        | 2.36E-10 | 0.48 | 0.86 | 0.55 | 7.88E-06 | CD8_4_Xcl1+ |
| <i>Rrp15</i>      | 2.66E-10 | 0.40 | 0.32 | 0.10 | 8.91E-06 | CD8_4_Xcl1+ |
| <i>Uqcrq</i>      | 6.02E-10 | 0.41 | 0.92 | 0.80 | 2.01E-05 | CD8_4_Xcl1+ |
| <i>Snhg1</i>      | 7.03E-10 | 0.63 | 0.63 | 0.35 | 2.35E-05 | CD8_4_Xcl1+ |
| <i>Npepl1</i>     | 9.93E-10 | 0.33 | 0.33 | 0.11 | 3.32E-05 | CD8_4_Xcl1+ |
| <i>Nop10</i>      | 1.10E-09 | 0.53 | 0.90 | 0.60 | 3.67E-05 | CD8_4_Xcl1+ |
| <i>Ppa1</i>       | 1.54E-09 | 0.52 | 0.41 | 0.18 | 5.16E-05 | CD8_4_Xcl1+ |
| <i>Preli2</i>     | 1.96E-09 | 0.49 | 0.39 | 0.15 | 6.55E-05 | CD8_4_Xcl1+ |
| <i>Ddx21</i>      | 2.76E-09 | 0.62 | 0.53 | 0.28 | 9.23E-05 | CD8_4_Xcl1+ |
| <i>Nifk</i>       | 3.01E-09 | 0.63 | 0.40 | 0.17 | 1.01E-04 | CD8_4_Xcl1+ |
| <i>Eif4e</i>      | 3.34E-09 | 0.50 | 0.68 | 0.38 | 1.12E-04 | CD8_4_Xcl1+ |
| <i>Hspe1</i>      | 3.42E-09 | 0.59 | 0.84 | 0.66 | 1.15E-04 | CD8_4_Xcl1+ |
| <i>Fdx1l</i>      | 3.58E-09 | 0.55 | 0.37 | 0.14 | 1.20E-04 | CD8_4_Xcl1+ |
| <i>Cnbp</i>       | 3.68E-09 | 0.50 | 0.87 | 0.74 | 1.23E-04 | CD8_4_Xcl1+ |
| <i>Tomm5</i>      | 3.73E-09 | 0.57 | 0.66 | 0.40 | 1.25E-04 | CD8_4_Xcl1+ |
| <i>Mrpl12</i>     | 3.81E-09 | 0.55 | 0.58 | 0.31 | 1.28E-04 | CD8_4_Xcl1+ |
| <i>Nhp2l1</i>     | 4.00E-09 | 0.49 | 0.78 | 0.54 | 1.34E-04 | CD8_4_Xcl1+ |
| <i>Mrpl17</i>     | 4.03E-09 | 0.54 | 0.51 | 0.26 | 1.35E-04 | CD8_4_Xcl1+ |
| <i>Phb2</i>       | 4.38E-09 | 0.49 | 0.70 | 0.43 | 1.47E-04 | CD8_4_Xcl1+ |
| <i>Bcl2a1b</i>    | 5.12E-09 | 0.49 | 0.85 | 0.66 | 1.71E-04 | CD8_4_Xcl1+ |
| <i>Atp5g1</i>     | 5.26E-09 | 0.48 | 0.82 | 0.62 | 1.76E-04 | CD8_4_Xcl1+ |
| <i>Rrp9</i>       | 5.38E-09 | 0.36 | 0.29 | 0.10 | 1.80E-04 | CD8_4_Xcl1+ |
| <i>Gadd45b</i>    | 5.90E-09 | 0.66 | 0.52 | 0.27 | 1.97E-04 | CD8_4_Xcl1+ |
| <i>Ndufaf4</i>    | 5.94E-09 | 0.56 | 0.38 | 0.15 | 1.99E-04 | CD8_4_Xcl1+ |
| <i>Hspa9</i>      | 9.31E-09 | 0.49 | 0.40 | 0.17 | 3.12E-04 | CD8_4_Xcl1+ |
| <i>Gnl3</i>       | 1.04E-08 | 0.39 | 0.33 | 0.12 | 3.47E-04 | CD8_4_Xcl1+ |
| <i>Ccl4</i>       | 1.13E-08 | 1.37 | 0.89 | 0.73 | 3.78E-04 | CD8_4_Xcl1+ |
| <i>Irf8</i>       | 1.14E-08 | 0.82 | 0.47 | 0.24 | 3.81E-04 | CD8_4_Xcl1+ |
| <i>Mrto4</i>      | 1.38E-08 | 0.41 | 0.35 | 0.14 | 4.61E-04 | CD8_4_Xcl1+ |
| <i>Sar1a</i>      | 1.40E-08 | 0.42 | 0.53 | 0.25 | 4.70E-04 | CD8_4_Xcl1+ |
| <i>Snhg6</i>      | 1.50E-08 | 0.42 | 0.29 | 0.10 | 5.03E-04 | CD8_4_Xcl1+ |



|                 |          |      |      |      |          |             |
|-----------------|----------|------|------|------|----------|-------------|
| <i>Wdr74</i>    | 1.57E-08 | 0.43 | 0.29 | 0.10 | 5.25E-04 | CD8_4_Xcl1+ |
| <i>Srsf2</i>    | 1.59E-08 | 0.45 | 0.79 | 0.54 | 5.32E-04 | CD8_4_Xcl1+ |
| <i>Nob1</i>     | 1.63E-08 | 0.46 | 0.29 | 0.10 | 5.47E-04 | CD8_4_Xcl1+ |
| <i>Cct3</i>     | 2.24E-08 | 0.51 | 0.45 | 0.22 | 7.49E-04 | CD8_4_Xcl1+ |
| <i>Cacybp</i>   | 3.20E-08 | 0.43 | 0.74 | 0.45 | 1.07E-03 | CD8_4_Xcl1+ |
| <i>Rrp1b</i>    | 3.51E-08 | 0.42 | 0.29 | 0.10 | 1.17E-03 | CD8_4_Xcl1+ |
| <i>Map2k3</i>   | 4.26E-08 | 0.59 | 0.44 | 0.22 | 1.42E-03 | CD8_4_Xcl1+ |
| <i>Bcap29</i>   | 4.62E-08 | 0.48 | 0.39 | 0.17 | 1.55E-03 | CD8_4_Xcl1+ |
| <i>Serbp1</i>   | 5.78E-08 | 0.43 | 0.87 | 0.70 | 1.93E-03 | CD8_4_Xcl1+ |
| <i>Tgif1</i>    | 6.22E-08 | 0.55 | 0.49 | 0.25 | 2.08E-03 | CD8_4_Xcl1+ |
| <i>Slc1a5</i>   | 8.28E-08 | 0.45 | 0.39 | 0.17 | 2.77E-03 | CD8_4_Xcl1+ |
| <i>Srsf7</i>    | 8.44E-08 | 0.44 | 0.76 | 0.52 | 2.83E-03 | CD8_4_Xcl1+ |
| <i>Ldha</i>     | 8.60E-08 | 0.46 | 0.89 | 0.71 | 2.88E-03 | CD8_4_Xcl1+ |
| <i>Mrps28</i>   | 9.01E-08 | 0.38 | 0.32 | 0.13 | 3.01E-03 | CD8_4_Xcl1+ |
| <i>Bcl2a1d</i>  | 9.48E-08 | 0.48 | 0.70 | 0.46 | 3.17E-03 | CD8_4_Xcl1+ |
| <i>Cct8</i>     | 1.01E-07 | 0.51 | 0.66 | 0.41 | 3.38E-03 | CD8_4_Xcl1+ |
| <i>Ruvbl1</i>   | 1.02E-07 | 0.32 | 0.31 | 0.12 | 3.40E-03 | CD8_4_Xcl1+ |
| <i>Mrpl36</i>   | 1.30E-07 | 0.42 | 0.58 | 0.32 | 4.35E-03 | CD8_4_Xcl1+ |
| <i>Eif3g</i>    | 1.50E-07 | 0.48 | 0.60 | 0.35 | 5.01E-03 | CD8_4_Xcl1+ |
| <i>Nip7</i>     | 1.69E-07 | 0.44 | 0.33 | 0.14 | 5.66E-03 | CD8_4_Xcl1+ |
| <i>Ppie</i>     | 1.78E-07 | 0.44 | 0.44 | 0.21 | 5.97E-03 | CD8_4_Xcl1+ |
| <i>Txnl4a</i>   | 1.87E-07 | 0.45 | 0.55 | 0.29 | 6.26E-03 | CD8_4_Xcl1+ |
| <i>Gm26667</i>  | 2.02E-07 | 0.30 | 0.28 | 0.10 | 6.75E-03 | CD8_4_Xcl1+ |
| <i>Srgn</i>     | 2.19E-07 | 0.47 | 0.93 | 0.80 | 7.31E-03 | CD8_4_Xcl1+ |
| <i>Cd160</i>    | 2.20E-07 | 0.50 | 0.44 | 0.21 | 7.35E-03 | CD8_4_Xcl1+ |
| <i>Rps25</i>    | 2.23E-07 | 0.28 | 1.00 | 0.93 | 7.45E-03 | CD8_4_Xcl1+ |
| <i>Eif1ax</i>   | 2.28E-07 | 0.41 | 0.61 | 0.35 | 7.61E-03 | CD8_4_Xcl1+ |
| <i>Chd1</i>     | 2.36E-07 | 0.43 | 0.44 | 0.20 | 7.91E-03 | CD8_4_Xcl1+ |
| <i>Wdr12</i>    | 2.83E-07 | 0.40 | 0.26 | 0.10 | 9.48E-03 | CD8_4_Xcl1+ |
| <i>Psma7</i>    | 2.83E-07 | 0.36 | 0.82 | 0.66 | 9.48E-03 | CD8_4_Xcl1+ |
| <i>Tmem238</i>  | 3.35E-07 | 0.39 | 0.29 | 0.11 | 1.12E-02 | CD8_4_Xcl1+ |
| <i>Hsp90ab1</i> | 3.91E-07 | 0.37 | 0.93 | 0.82 | 1.31E-02 | CD8_4_Xcl1+ |
| <i>Hnrnp11</i>  | 4.15E-07 | 0.43 | 0.35 | 0.15 | 1.39E-02 | CD8_4_Xcl1+ |
| <i>Ran</i>      | 4.57E-07 | 0.33 | 0.92 | 0.71 | 1.53E-02 | CD8_4_Xcl1+ |
| <i>Erh</i>      | 5.75E-07 | 0.37 | 0.86 | 0.67 | 1.92E-02 | CD8_4_Xcl1+ |
| <i>Brix1</i>    | 6.24E-07 | 0.46 | 0.41 | 0.21 | 2.09E-02 | CD8_4_Xcl1+ |
| <i>Ddx18</i>    | 6.34E-07 | 0.63 | 0.41 | 0.21 | 2.12E-02 | CD8_4_Xcl1+ |
| <i>Metap2</i>   | 6.42E-07 | 0.41 | 0.66 | 0.40 | 2.15E-02 | CD8_4_Xcl1+ |
| <i>Sh2d2a</i>   | 6.51E-07 | 0.42 | 0.82 | 0.54 | 2.18E-02 | CD8_4_Xcl1+ |
| <i>Bola3</i>    | 6.87E-07 | 0.47 | 0.62 | 0.37 | 2.30E-02 | CD8_4_Xcl1+ |
| <i>Ndufa12</i>  | 8.68E-07 | 0.38 | 0.70 | 0.46 | 2.90E-02 | CD8_4_Xcl1+ |
| <i>Kdm6b</i>    | 9.25E-07 | 0.75 | 0.37 | 0.17 | 3.09E-02 | CD8_4_Xcl1+ |
| <i>Prpf19</i>   | 9.46E-07 | 0.35 | 0.32 | 0.14 | 3.16E-02 | CD8_4_Xcl1+ |
| <i>Tomm70a</i>  | 1.02E-06 | 0.40 | 0.36 | 0.16 | 3.42E-02 | CD8_4_Xcl1+ |
| <i>Llph</i>     | 1.17E-06 | 0.40 | 0.61 | 0.39 | 3.93E-02 | CD8_4_Xcl1+ |
| <i>Hspa8</i>    | 1.30E-06 | 0.30 | 0.97 | 0.96 | 4.35E-02 | CD8_4_Xcl1+ |
| <i>Psme3</i>    | 1.31E-06 | 0.41 | 0.37 | 0.18 | 4.38E-02 | CD8_4_Xcl1+ |
| <i>Rps27l</i>   | 1.40E-06 | 0.37 | 0.75 | 0.57 | 4.69E-02 | CD8_4_Xcl1+ |

*Cct7*

1.41E-06

0.52

0.63

0.44

4.71E-02

CD8\_4\_Xcl1+
